# Supplementary material for: Geochemical Insights From Clinopyroxene Phenocrysts Into the Magma Evolution of an Alkaline Magmatic System From the Sanshui Basin, South China
Source: Preprints.org preprint supplement (doi:10.20944/preprints202111.0046.v1), 2021-11-02
Supplement: Supplementary file 1 [file TableS1.xlsx]

## Sheet: Table S1
Table S1. Electron microprobe analyses of clinopyroxene for the bimodal volcanic rocks, Sanshui Basin
Data	reference	Location	SiO2	TiO2	Al2O3	Cr2O3	FeO	MnO	MgO	CaO	Na2O	K2O	sum	type	site	Si	Ti	AlIV	AlVI	Cr	Fe3+	Fe2+	Mn	Mg	Ca	Na	K	Mg#	Wo	En	Fs	Pressure	Temperature
14ss003-5-1-1	this paper	zoumaying	51.934	0.24	0.195	0.017	31.737	0.469	0.049	1.965	11.691	0.011	98.308	T4	m	2.03151	0.00706278	0	0.00898994	0.000525763	0.812253	0.151682	0.0155391	0.00285742	0.0823577	0.886673	0.000548929	0.295557	7.84994	0.272356	91.8777	2.04434	880.851
14ss003-5-1-4	this paper	zoumaying	52.97	0.658	0.31	0	31.208	0.598	0.16	1.79	12.135	0.008	99.837	T4	m	2.03151	0.018985	0	0.0140121	0	0.797783	0.13285	0.0194256	0.00914784	0.0735555	0.902344	0.000391412	0.973401	7.25874	0.902745	91.8385	2.1911	877.02
17ss054-1-1-1	this paper	shiling	46.937	0.375	5.96	0.26	26.113	0.332	5.593	2.337	0.607	0.162	88.676	T2	m	2.09222	0.0125754	0	0.313107	0.00916304	0	1.01545	0.0125348	0.371662	0.111616	0.0524596	0.00921221	26.794	7.44737	24.7985	67.7541
14ss003-3-2-2	this paper	zoumaying	51.357	0.629	0.915	0.029	18.472	0.878	8.182	19.379	0.438	0.003	100.282	T2	m	1.99471	0.0183792	0.00528949	0.0365953	0.000890537	0	0.601902	0.0288842	0.473751	0.806465	0.0329836	0.000148648	44.0431	42.8488	25.1712	31.98
14ss003-3-2-6	this paper	zoumaying	50.196	0.527	0.663	0.015	21.207	0.854	6.219	19.037	0.485	0.003	99.206	T2	m	1.99803	0.0157812	0.00197495	0.0291279	0.00047206	0	0.70731	0.0287923	0.369031	0.811903	0.0374298	0.000152338	34.2857	42.9978	19.5436	37.4586
14ss003-3-2-7	this paper	zoumaying	49.963	0.461	0.786	0.047	21.423	1.015	5.888	19.154	0.501	0.059	99.297	T2	m	1.99047	0.0138167	0.0095341	0.0273708	0.0014804	0	0.714097	0.0342498	0.349691	0.817598	0.038698	0.00299857	32.8723	43.4572	18.5869	37.9559
14ss003-3-3-1	this paper	zoumaying	50.513	0.651	0.874	0.006	17.917	0.834	8.688	19.405	0.535	0.023	99.446	T2	c	1.97103	0.0191104	0.0289668	0.0112268	0.000185104	0.0219867	0.561629	0.027564	0.505384	0.811294	0.0404752	0.00114492	46.4081	42.6931	26.595	30.7119
14ss003-3-4-1	this paper	zoumaying	49.23	0.293	0.398	0.027	27.025	1.081	2.22	19.024	0.709	0.022	100.029	T2	m	1.99898	0.00895042	0.00101916	0.0180274	0.000866795	0.0228905	0.893082	0.0371784	0.134382	0.827665	0.0558174	0.00113961	12.794	44.0712	7.15554	48.7733
14ss003-3-4-2	this paper	zoumaying	49.621	0.305	0.303	0	26.184	1.334	3.299	18.358	0.885	0.002	100.291	T2	m	1.99132	0.00928078	0.00868048	0.00576344	0	0.0480483	0.827193	0.0457014	0.198921	0.795586	0.0694025	0.000103199	18.5187	42.5504	10.6389	46.8107
14ss003-2-1-2	this paper	zoumaying	49.742	0.511	0.674	0	21.77	1.052	5.631	19.787	0.553	0.029	99.749	T2	m	1.97633	0.015274	0.023673	0.00788795	0	0.0311045	0.69039	0.0354028	0.333528	0.842344	0.0425995	0.00146991	31.6133	44.3955	17.5785	38.0261	1.60015	878.559
14ss003-2-2-2	this paper	zoumaying	50.835	0.548	0.714	0.007	20.621	0.808	6.496	19.259	0.593	0.034	99.915	T2	m	2.00194	0.0162355	0	0.0331392	0.000217952	0	0.680517	0.0269517	0.38137	0.812638	0.0452781	0.00170814	35.9143	43.3517	20.3449	36.3034
14ss012c-1	this paper	wangjiegang	49.893	1.949	6.54	0.022	7.732	0.193	13.784	19.089	0.804	0	100.006	B1	c	1.84299	0.0541617	0.15701	0.127708	0.00064251	0	0.239309	0.00603847	0.759048	0.755511	0.0575816	0	76.0298	43.0768	43.2785	13.6446	13.098	1233.15
14sszd-s2-4	this paper	zidong	50.408	2.012	3.71	0.384	9.424	0.27	14.1	19.006	0.423	0.02	99.757	B1	c	1.8852	0.0566085	0.114805	0.0487206	0.0113543	0	0.295431	0.00855277	0.786116	0.761591	0.030672	0.000954208	72.6844	41.3203	42.651	16.0287	6.67839	1171.59
19ss024-2-2	this paper	jilixu	52.085	0.858	1.921	0.037	12.623	0.41	13.836	17.479	0.378	0	99.627	B1	c	1.96458	0.0243467	0.0354246	0.0499716	0.0011034	0	0.399447	0.0130986	0.777996	0.706393	0.0276434	0	66.075	37.4976	41.2985	21.2039	5.74066	1099.81
19ss024-2-4	this paper	jilixu	50.765	1.552	3.596	0	11.582	0.365	13.131	18.824	0.539	0.003	100.357	B1	c	1.89843	0.0436635	0.101572	0.0569193	0	0	0.362335	0.0115614	0.732046	0.754251	0.0390807	0.000143122	66.8913	40.8005	39.5993	19.6002	7.86063	1113.05
14sszd-s2-5	this paper	zidong	49.498	2.246	4.325	0.125	10.136	0.199	12.968	20.025	0.462	0	99.984	B1	c	1.85538	0.0633363	0.144617	0.0464505	0.0037045	0.00140255	0.316307	0.00631808	0.724652	0.804253	0.0335762	0	69.5202	43.5528	39.2422	17.205	6.8931	1157.95
19ss027-1-1-2	this paper	xiqiaoshan	50.464	0.299	0.613	0.006	22.804	0.913	4.937	19.093	0.668	0.009	99.806	T2	m	2.0103	0.00896082	0	0.0287803	0.000188975	0	0.760774	0.0308061	0.293193	0.814944	0.0515941	0.000457381	27.818	43.6053	15.6879	40.7068	2.75773	829.074
19ss027-1-1-3	this paper	xiqiaoshan	49.916	0.313	0.616	0.05	24.576	0.915	4.081	18.931	0.547	0.008	99.953	T2	g	2.00255	0.00944678	0	0.0291258	0.00158594	0	0.825426	0.0310921	0.244073	0.813748	0.0425475	0.000409439	22.8213	43.2099	12.9602	43.8299
19ss027-1-2-3	this paper	xiqiaoshan	50.757	0.305	0.608	0	23.143	0.916	4.806	19.254	0.517	0	100.306	T2	m	2.0162	0.00911454	0	0.028464	0	0	0.771514	0.0308191	0.284599	0.81947	0.0398174	0	26.9478	43.6915	15.1739	41.1346	2.91345	826.028
19ss027-1-2-4	this paper	xiqiaoshan	50.05	0.436	0.131	0	29.663	0.883	0.917	12.53	4.068	0.002	98.68	T3	m	2.03686	0.0133487	0	0.00628323	0	0.22944	0.76055	0.0304371	0.0556335	0.546364	0.320983	0.000103835	5.32061	34.3196	3.4946	62.1858
19ss027-1-3-3	this paper	xiqiaoshan	51.646	0.899	1.895	0.036	13.692	0.623	11.23	19.42	0.496	0.011	99.948	T2	inclusion	1.96526	0.0257359	0.0347418	0.0502441	0.00108308	0	0.436896	0.0200797	0.63705	0.791783	0.0365939	0.000533989	59.3186	42.4383	34.1448	23.4169
19ss027-1-3-4	this paper	xiqiaoshan	52.094	0.608	1.12	0.049	15.729	0.733	9.68	19.827	0.434	0.003	100.277	T2	inclusion	2.00346	0.0174754	0	0.0504312	0.00148012	0	0.508181	0.0237201	0.551331	0.811629	0.0321485	0.000146219	52.0363	43.3762	29.465	27.1589
19ss027-1-3-5	this paper	xiqiaoshan	52.021	0.43	1.128	0.011	15.424	0.635	10.168	19.57	0.475	0.004	99.866	T2	inclusion	1.99676	0.0124169	0.00323694	0.0477914	0.000333822	0	0.496594	0.0206447	0.581827	0.804846	0.0353497	0.000195868	53.9517	42.7367	30.8946	26.3688
19ss027-1-3-6	this paper	xiqiaoshan	51.912	0.588	1.236	0.018	14.776	0.572	10.315	19.738	0.463	0	99.618	T2	inclusion	1.99398	0.0169913	0.00602375	0.0499295	0.000546636	0	0.476465	0.0186095	0.590653	0.812324	0.0344808	0	55.3503	43.2216	31.427	25.3514
19ss027-1-4-1	this paper	xiqiaoshan	51.788	0.545	1.1	0	16.116	0.693	9.761	19.07	0.445	0	99.518	T2	inclusion	2.00209	0.0158506	0	0.0501188	0	0	0.52344	0.022692	0.562547	0.789911	0.0333548	0	51.8005	42.1084	29.9881	27.9035
19ss027-1-4-3	this paper	xiqiaoshan	51.518	0.6	1.135	0.052	16.579	0.657	9.55	19.116	0.481	0.019	99.707	T2	inclusion	1.9913	0.0174472	0.00870423	0.0430002	0.00158911	0	0.537505	0.0215094	0.550289	0.791677	0.0360468	0.000936886	50.5876	42.1223	29.2789	28.5987
17ss063-1-1-1	this paper	shitoucun	50.306	1.82	3.597	0.039	9.397	0.234	13.883	19.715	0.48	0.024	99.495	B1	c	1.88446	0.0512903	0.115539	0.043265	0.00115506	0.0046602	0.289617	0.00742453	0.775285	0.791294	0.034862	0.00114692	72.4862	42.5231	41.6628	15.8141
17ss063-1-2-1	this paper	shitoucun	51.166	1.171	2.528	0	10.561	0.294	13.906	18.893	0.659	0.007	99.185	B1	c	1.9244	0.0331336	0.0755959	0.036463	0	0.0218225	0.309764	0.00936587	0.7797	0.76136	0.0480557	0.000335868	70.162	40.6569	41.6363	17.7068
17ss063-1-3-1	this paper	shitoucun	52.074	1.238	1.527	0	11.913	0.471	14.052	18.198	0.286	0.006	99.765	B1	c	1.96118	0.0350764	0.0388161	0.0289623	0	0	0.376484	0.0150246	0.788944	0.734336	0.0208837	0.000288274	67.6956	38.6541	41.5285	19.8174	6.58696	1182.27
14ss009-1-1-2	this paper	zoumaying	50.608	0.416	0.122	0.002	28.993	1.223	1.319	15.279	2.761	0.003	100.726	T3	m	2.02903	0.0125476	0	0.0057648	6.33977e-05	0.135289	0.825801	0.0415319	0.0788361	0.656355	0.214625	0.000153443	7.58094	38.6938	4.64759	56.6586	8.01568	1198.26
14ss009-1-1-3	this paper	zoumaying	48.63	0.509	0.355	0.021	28.664	1.202	1.078	18.607	0.797	0	99.863	T2	m	1.99555	0.0157135	0.00444947	0.0127194	0.000681321	0.0250353	0.956611	0.0417781	0.0659459	0.818105	0.0634105	0	6.295	43.8498	3.53465	52.6155
14ss009-1-2-1	this paper	zoumaying	49.055	0.263	0.301	0.034	30.022	1.273	0.815	17.99	1.044	0.009	100.806	T2	m	1.99777	0.00805778	0.00222708	0.0122201	0.00109475	0.0605708	0.956766	0.0439114	0.0494802	0.784997	0.0824342	0.000467586	4.63811	42.3907	2.67198	54.9373
14ss009-1-2-4	this paper	zoumaying	49.745	0.441	0.223	0.025	28.385	1.277	1.539	17.147	1.756	0.002	100.54	T2	m	2.00836	0.0133945	0	0.0106109	0.000798004	0.0891372	0.862107	0.0436685	0.0926276	0.741743	0.137455	0.00010301	8.87347	41.5399	5.18744	53.2726
14ss003-7-2-1	this paper	zoumaying	48.54	0.401	0.411	0	29.165	1.106	0.76	17.763	1.094	0.007	99.247	T2	m	2.00428	0.0124566	0	0.0200012	0	0.0375175	0.966464	0.0386812	0.0467824	0.785867	0.087583	0.000368734	4.45223	42.7885	2.54719	54.6643
14ss003-7-2-5	this paper	zoumaying	50.492	0.762	0.114	0.052	30.145	0.965	0.188	11.418	5.177	0.045	99.358	T3	m	2.0353	0.0231077	0	0.00541583	0.00165723	0.301126	0.689096	0.0329472	0.0112973	0.493139	0.404602	0.00231406	1.12801	32.9934	0.755844	66.2507
19ss035-1-2-4	this paper	zoumaying	51.033	0.034	0.163	0	32.626	3.038	0.008	0.01	11.587	0	98.499	T4	inclusion	2.0194	0.000995073	0	0.00747345	0	0.868106	0.129074	0.100104	0.000463959	0.000416824	0.873965	0	0.0465055	0.0417634	0.046486	99.9118
14ss012-1-1	this paper	wangjiegang	47.522	1.768	6.078	0.175	7.057	0.206	14.194	21.306	0.761	0.017	99.084	B1	c	1.76598	0.0494277	0.234021	0.0321783	0.00514165	0.154301	0.0621639	0.00648402	0.786333	0.848334	0.0548302	0.000805928	78.4139	45.8278	42.4785	11.6937
14ss012-1-2	this paper	wangjiegang	47.858	1.96	4.678	0.271	6.968	0.195	14.665	22.165	0.538	0.01	99.308	B1	r	1.77844	0.0547945	0.20488	0	0.0079621	0.160657	0.0529578	0.00613769	0.812413	0.882523	0.0387624	0.000474068	79.1804	46.2405	42.567	11.1925
14ss012-2-1	this paper	wangjiegang	49.235	0.457	2.14	0.27	12.797	0.537	11.38	21.092	0.786	0.003	98.697	B3	c	1.88603	0.0131701	0.0966149	0	0.00817736	0.158658	0.245826	0.0174235	0.649873	0.8657	0.0583771	0.000146606	61.6369	45.0872	33.8466	21.0662	11.7852	1187.66
14ss012-2-2	this paper	wangjiegang	49.706	0.287	1.549	0.069	13.063	0.582	11.756	21.424	0.76	0.018	99.214	B3	c	1.89312	0.00822333	0.0695305	0	0.00207774	0.186276	0.223256	0.0187749	0.667482	0.874266	0.0561212	0.000874577	61.9752	44.8048	34.2074	20.9879
14ss012-2-3	this paper	wangjiegang	46.771	3.167	4.476	0.196	7.67	0.132	13.05	23.247	0.529	0.011	99.249	B3	r	1.75772	0.0895399	0.198252	0	0.00582374	0.141653	0.0965345	0.00420177	0.731127	0.93608	0.0385453	0.000527377	75.4272	49.1279	38.3714	12.5007	10	1118.93
14ss012-2-4	this paper	wangjiegang	48.049	2.707	3.771	0.011	7.155	0.095	14.006	23.365	0.677	0.046	99.882	B3	r	1.78285	0.0755641	0.164908	0	0.000322698	0.16954	0.0493078	0.00298566	0.774738	0.928902	0.0487038	0.00217743	77.9739	48.3177	40.2987	11.3836	9	1114.3
14ss012-3-1	this paper	wangjiegang	45.898	2.474	8.274	0.049	7.205	0.201	13.704	21.516	0.833	0.018	100.172	B1	c	1.68789	0.0684456	0.312115	0.0464929	0.00142469	0.188029	0.0300363	0.00626082	0.751289	0.847783	0.0593934	0.000844458	77.5041	46.6549	41.3446	12.0005	6.7	1018.29
14ss012-3-2	this paper	wangjiegang	45.32	3.501	5.552	0.218	7.316	0.138	12.883	23.178	0.629	0.001	98.736	B1	r	1.70899	0.0993207	0.246749	0	0.00649952	0.176921	0.0503524	0.00440774	0.724233	0.936485	0.0459881	4.81069e-05	76.1143	49.6022	38.36	12.0379	6.40139	985.381
17SS054-1-1	this paper	shiling	46.54	0.361	0.312	0.012	27.677	0.997	2.359	19.769	1.472	0.014	99.513	T2	m	1.8966	0.0110676	0.0149851	0	0.000386638	0.302602	0.616403	0.0344137	0.143314	0.863194	0.116306	0.000727837	13.4907	44.8293	7.44289	47.7278	11.5166	1189.25
17SS054-2-1	this paper	shiling	48.306	0.525	0.774	0	21.2	0.883	6.666	21.359	0.527	0	100.24	T2	inclusion	1.90057	0.0155396	0.0358905	0	0	0.179903	0.507076	0.0294259	0.390984	0.900406	0.0402011	0	36.2707	45.5125	19.763	34.7245
17SS054-5-1	this paper	shiling	47.057	0.379	0.217	0	28.026	1.122	1.737	19.509	1.509	0	99.556	T2	c	1.9227	0.01165	0.0104497	0	0	0.255463	0.68148	0.03883	0.105803	0.854078	0.119542	0	10.1466	45.0267	5.57791	49.3954
17SS051-3-1	this paper	shiling	46.729	1.85	4.402	0.001	9.446	0.192	14.428	22.359	0.59	0.003	100	T1	c	1.73396	0.051644	0.192511	0	2.93376e-05	0.279024	0.00714163	0.00603446	0.79812	0.888951	0.0424471	0.000142013	73.6079	45.0504	40.4473	14.5023
17SS051-3-3	this paper	shiling	45.751	2.23	5.393	0.049	8.929	0.194	14.348	22.384	0.504	0.018	99.8	T1	m	1.69994	0.0623353	0.236166	0	0.00143947	0.270963	0	0.00610548	0.794757	0.891136	0.0363084	0.00085322	74.5746	45.5392	40.614	13.8469
17SS051-3-5	this paper	shiling	46.102	2.109	5.151	0	8.347	0.204	14.059	22.369	0.519	0	98.86	T1	m	1.7331	0.0593101	0.226935	0	0	0.235916	0.0212645	0.00645909	0.783466	0.895933	0.0376155	0	75.2864	46.2637	40.4562	13.2802	3.58731	1100.73
17ss065-2-1	this paper	jiangbian	44.108	2.932	7.376	0.109	7.786	0.279	12.635	23.156	0.714	0.007	99.102	B1	r	1.65289	0.0826587	0.325764	0	0.00322945	0.238786	0	0.0088556	0.705852	0.929748	0.0518765	0.000334643	74.722	49.6028	37.6578	12.7394	5.42857	1099.69
17ss065-2-2	this paper	jiangbian	44.286	2.953	6.381	0	7.971	0.258	14.352	22.972	0.677	0.074	99.924	B1	g	1.6381	0.0821739	0.278174	0	0	0.239598	0	0.00808312	0.791401	0.910429	0.0485519	0.0034919	76.7606	46.8948	40.7639	12.3413	5.03495	1100.58
17SS066-1-1-1	this paper	wangjiegang	48.606	0.746	1.293	0.041	12.79	0.591	11.41	22.523	0.539	0	98.539	B3	c	1.87077	0.0216006	0.058652	0	0.00124763	0.199112	0.205641	0.0192665	0.654675	0.928817	0.0402219	0	61.7952	46.7154	32.9273	20.3573
17SS066-1-1-2	this paper	wangjiegang	49.833	0.722	1.21	0.042	12.525	0.636	11.728	22.838	0.453	0	99.987	B3	m	1.88874	0.0205868	0.0540498	0	0.00125857	0.162519	0.229045	0.0204173	0.662657	0.927441	0.0332887	0	62.8575	46.8012	33.4394	19.7594
17SS066-1-1-3	this paper	wangjiegang	45.442	2.816	6.88	0.121	7.878	0.221	13.408	22.242	0.589	0.017	99.614	B3	r	1.69222	0.0788912	0.301955	0	0.00356253	0.196358	0.0449116	0.00697071	0.744344	0.887456	0.0425264	0.000807614	75.5208	47.3798	39.7392	12.881	9.03862	1040.54
17SS066-1-2-1	this paper	wangjiegang	46.921	1.57	6.722	0.169	6.888	0.117	14.542	21.337	0.849	0.024	99.139	B1	C	1.73565	0.043691	0.264348	0.028707	0.00494261	0.205409	0.00396922	0.00366579	0.801919	0.845674	0.0608902	0.00113256	79.2961	45.5405	43.1842	11.2753	8.91349	1074.92
17SS066-1-3-2	this paper	wangjiegang	47.5	2.362	3.525	0.054	7.972	0.161	14.005	22.689	0.547	0.019	98.834	B1	C	1.78489	0.0667722	0.156111	0	0.0016043	0.180741	0.0659578	0.00512425	0.784535	0.913499	0.039852	0.000910812	76.0773	46.973	40.3415	12.6855	6.2	1104.55
17SS066-1-3-3	this paper	wangjiegang	46.139	1.562	7.424	0.195	7.207	0.108	15.433	20.268	0.651	0.006	98.993	B1	M	1.70542	0.0434351	0.294581	0.028831	0.00569864	0.218625	0	0.00338121	0.850402	0.80269	0.0466539	0.000282925	79.5491	42.8852	45.4343	11.6805	12.3202	1198.51
17SS066-3-1-1	this paper	wangjiegang	49.405	0.232	1.12	0	13.962	0.984	9.626	23.222	0.748	0.012	99.311	B3	C	1.90172	0.00671833	0.05081	0	0	0.192851	0.249281	0.0320817	0.552374	0.957746	0.0558242	0.00058927	55.5425	49.0585	28.2942	22.6473	7.09803	1079.85
17SS066-3-1-2	this paper	wangjiegang	46.816	2.654	4.234	0	7.385	0.206	13.849	23.12	0.528	0.008	98.8	B3	R	1.75822	0.0749852	0.187406	0	0	0.185701	0.0426065	0.00655286	0.775366	0.930336	0.0384464	0.000383287	77.2528	48.104	40.0911	11.8049	10.862	1196.68
17SS066-3-1-3	this paper	wangjiegang	49.848	0.335	0.985	0	14.496	0.877	9.595	22.283	0.651	0.005	99.075	B3	C	1.92763	0.00974582	0.0448918	0	0	0.133152	0.3304	0.0287251	0.553136	0.92326	0.0488092	0.000246662	54.4057	47.592	28.5129	23.8951
17SS066-3-1-4	this paper	wangjiegang	47.419	2.834	4.796	0.064	7.531	0.182	13.835	22.688	0.52	0.033	99.902	B3	R	1.76256	0.0792479	0.210099	0	0.00188081	0.144517	0.0867369	0.00572992	0.766621	0.903569	0.0374747	0.00156481	76.8254	47.5201	40.3179	12.162	6.76023	1039.48
17SS066-3-2-1	this paper	wangjiegang	46.018	2.274	7.325	0.047	8.317	0.201	13.299	21.711	0.771	0.007	99.97	B1	C	1.70439	0.0633619	0.295612	0.0241324	0.0013763	0.199993	0.0532615	0.00630555	0.734295	0.861578	0.0553655	0.000330746	74.3552	46.5938	39.7103	13.6959	9.3864	1043.94
17ss081-1-1	this paper	shitoucun	46.073	2.017	5.172	0.207	8.635	0.149	14.268	21.622	0.618	0.02	98.781	B1	C	1.74055	0.0564395	0.226722	0	0.0060873	0.245727	0.0214367	0.0046941	0.791141	0.861688	0.044567	0.000949001	74.7555	44.8798	41.2054	13.9148	6.2723	1093.58
17ss081-1-2	this paper	shitoucun	47.666	2.078	2.751	0.076	9.479	0.13	14.658	22.478	0.484	0.011	99.811	B1	R	1.77702	0.058281	0.120873	0	0.00224012	0.242766	0.046678	0.00410501	0.814648	0.897876	0.0349844	0.000523159	73.7844	44.8497	40.6924	14.458	11.6353	1170.63
18ss014-1-1	this paper	xiqiaoshan	48.14	0.777	1.468	0.08	13.734	0.479	12.829	21.708	0.55	0.002	99.767	A1	c	1.82375	0.0221451	0.0655451	0	0.0023962	0.284246	0.140355	0.0153702	0.724541	0.881157	0.0403986	9.66597e-05	63.0506	43.4004	35.6864	20.9132
18ss014-2-1	this paper	xiqiaoshan	47.696	0.941	1.664	0.024	13.015	0.522	12.764	21.348	0.519	0.008	98.501	A1	c	1.82759	0.0271258	0.0751458	0	0.000727079	0.257017	0.150942	0.0169416	0.729112	0.876452	0.0385574	0.00039106	64.122	43.5283	36.2108	20.2609
18ss014-3-1	this paper	xiqiaoshan	47.163	1.101	2.119	0.042	13.451	0.423	13.079	21.394	0.58	0.057	99.409	A1	c	1.78905	0.0314199	0.0947342	0	0.00125963	0.311324	0.104056	0.0135909	0.739616	0.869535	0.0426573	0.00275837	64.0362	42.9499	36.5327	20.5173	8.15369	1101.85
18ss082-1-1	this paper	zidong	47.514	1.534	3.787	0	9.516	0.204	14.223	21.694	0.607	0	99.079	B2	C	1.7807	0.0432505	0.16727	0	0	0.23018	0.0622506	0.00647567	0.79464	0.871129	0.0441064	0	73.0992	44.4862	40.5801	14.9337	7.90432	1108.34
18ss082-1-2	this paper	zidong	50.366	0.7	1.835	0.008	12.088	0.553	12.621	21.476	0.61	0.022	100.279	B2	R	1.89077	0.0197695	0.0811879	0	0.000237446	0.145804	0.229043	0.0175838	0.706326	0.863829	0.0443991	0.00105361	65.3296	44.4128	36.3149	19.2723	7.25117	1099.78
18ss082-2-1	this paper	zidong	49.362	1.001	2.997	0.093	11.674	0.273	16.185	16.798	0.436	0.005	98.824	B1	C	1.85258	0.0282628	0.132564	0	0.00275957	0.137592	0.224575	0.00867826	0.905539	0.675485	0.0317259	0.000239392	71.4313	34.7616	46.6006	18.6378	7.4	1123.25
18ss082-4-1	this paper	zidong	45.633	2.588	7.245	0.043	9.391	0.125	12.809	21.771	0.775	0.005	100.385	B1	C	1.69164	0.0721756	0.308358	0.00817712	0.00126029	0.211863	0.074055	0.00392487	0.707873	0.864732	0.0557026	0.000236459	71.2296	46.5279	38.0879	15.3841	8.38	1131.12
19ss027-1-1-1	this paper	xiqiaoshan	45.535	0.392	0.602	0.087	23.668	0.96	5.205	21.658	0.56	0	98.667	T2	m	1.84464	0.0119468	0.0287421	0	0.00278651	0.312065	0.468484	0.0329401	0.314339	0.940069	0.0439845	0	28.7097	46.196	15.447	38.357	9.9	1169.52
19ss027-1-1-6	this paper	xiqiaoshan	45.345	0.422	0.224	0.138	30.258	1.148	1.16	14.662	3.389	0.343	97.089	T3	m	1.89514	0.0132685	0.0110335	0	0.00455999	0.4835	0.530118	0.0406386	0.0722736	0.656566	0.274617	0.0182878	6.65569	37.6805	4.1478	58.1717	9	1122.47
19ss027-1-1-7	this paper	xiqiaoshan	46.346	0.42	0.487	0.033	25.744	1.174	4.623	20.212	0.674	0.099	99.812	T2	m	1.86796	0.0127351	0.0231334	0	0.00105158	0.286154	0.560509	0.0400783	0.277773	0.872848	0.0526695	0.00509034	24.7033	43.7018	13.9075	42.3907
19ss027-1-4-1	this paper	xiqiaoshan	45.766	0.349	0.702	0	23.025	0.962	5.92	21.375	0.948	0.023	99.07	T2	c	1.83212	0.010512	0.0331249	0	0	0.368507	0.378063	0.032623	0.353342	0.916944	0.0735894	0.00117475	32.1246	45.464	17.5194	37.0165
19ss027-1-4-3	this paper	xiqiaoshan	46.815	0.854	0.253	0	30.958	0.288	0.123	5.098	12.064	0.031	96.484	T4	c	1.86603	0.0256088	0.0118853	0	0	0.927812	0	0.00972327	0.00730886	0.217725	0.932329	0.00157635	0.781595	18.8858	0.633984	80.4802
19ss027-1-6-1	this paper	xiqiaoshan	46.185	0.361	0.597	0	24.504	0.824	4.762	21.746	0.61	0.015	99.604	T2	m	1.85786	0.0109249	0.0283036	0	0	0.295564	0.508078	0.0280754	0.28557	0.937274	0.0475759	0.000769769	26.2181	46.2512	14.0919	39.6569
19ss027-1-6-2	this paper	xiqiaoshan	46.053	0.702	1.013	0.006	21.043	0.875	7.283	21.409	0.659	0.009	99.052	T2	m	1.82871	0.0209711	0.047408	0	0.00018837	0.314299	0.365798	0.0294294	0.43113	0.910873	0.0507361	0.000455917	38.7976	45.0459	21.3209	33.6332
19ss059-10-1	this paper	shiling	46.267	0.421	0.346	0	29.166	1.029	0.799	20.88	0.732	0.033	99.673	T2	c	1.91092	0.0130813	0.0168423	0	0	0.20957	0.780032	0.0359975	0.0491958	0.924007	0.0586173	0.00173877	4.73585	47.0759	2.50641	50.4177
19ss059-11-2	this paper	shiling	46.374	0.474	0.201	0	29.803	0.747	0.663	13.412	5.5	0.034	97.208	T3	m	1.9069	0.0146632	0.00974103	0	0	0.607624	0.363223	0.0260172	0.0406423	0.590911	0.438491	0.00178357	4.01807	36.8766	2.53634	60.5871
19ss059-2-1	this paper	shiling	42.639	0.609	0.707	0	25.132	1.138	2.408	24.959	0.576	0.095	98.263	T2	c	1.76482	0.018963	0.0344879	0	0	0.464623	0.370531	0.0398952	0.14858	1.10686	0.0462231	0.00501617	15.1037	52.9448	7.10705	39.9481
19ss059-5-1	this paper	shiling	45.149	0.551	0.194	0	29.344	0.868	0.77	16.147	3.516	0.023	96.562	T3	m	1.8939	0.0173883	0.00959101	0	0	0.47685	0.510367	0.03084	0.0481515	0.725728	0.285957	0.00123081	4.65066	41.2089	2.73418	56.0569
19ss059-5-2	this paper	shiling	45.062	0.358	0.452	0	28.284	1.219	1.719	21.136	0.587	0.011	98.828	T2	m	1.8707	0.0111808	0.022115	0	0	0.278407	0.680376	0.0428632	0.106385	0.940138	0.0472473	0.000582564	9.98764	46.8825	5.30518	47.8123
19ss059-5-3	this paper	shiling	45.768	0.335	0.217	0	30.414	1.224	0.899	18.079	2.459	0.001	99.396	T3	m	1.88144	0.0103602	0.0105134	0	0	0.42393	0.583709	0.0426182	0.0550932	0.796299	0.195988	5.24426e-05	5.18411	42.8341	2.96354	54.2024
19ss059-6-1	this paper	shiling	46.149	0.448	0.406	0	29.343	1.067	0.971	20.38	0.859	0	99.623	T2	m	1.90523	0.0139142	0.0197545	0	0	0.225662	0.768121	0.0373108	0.0597605	0.901493	0.0687578	0	5.67234	46.1113	3.05675	50.8319
19ss059-6-3	this paper	shiling	44.441	0.388	0.174	0	25.251	1.233	0.762	26.108	1.22	0.007	99.584	T2	m	1.81804	0.0119412	0.00838925	0	0	0.444132	0.386802	0.0427236	0.0464713	1.14437	0.0967661	0.00036532	5.29644	56.6022	2.29854	41.0992
20ss032-2-1-1cpx	this paper	xiqiaoshan	51.504	0.24	0.198	0	22.616	1.121	3.661	18.499	1.49	0.004	99.333	T2	m	2.06013	0.00722206	0	0.00933411	0	0	0.758453	0.0379791	0.218305	0.792822	0.115554	0.000204112	22.35	44.8028	12.3365	42.8606	4.16937	814.559
20ss032-2-1-2cpx	this paper	xiqiaoshan	50.817	0.341	0.713	0.031	20.315	0.725	5.07	20.277	0.505	0.035	98.829	T2	r	2.03326	0.0102645	0	0.0336224	0.000980664	0	0.684635	0.0245702	0.302415	0.869286	0.039176	0.00178653	30.6383	46.8281	16.291	36.881
20ss032-2-2-1cpx	this paper	xiqiaoshan	50.399	0.292	0.615	0.004	22.354	0.874	3.493	20.228	0.504	0.001	98.764	T2	m	2.04761	0.00882378	0	0.0291142	0.000127031	0	0.765558	0.0297353	0.209163	0.870567	0.0392509	5.12426e-05	21.4587	47.1778	11.335	41.4872
20ss032-2-3-1cpx	this paper	xiqiaoshan	51.068	0.348	0.726	0	19.462	0.737	5.887	20.464	0.443	0	99.135	T2	m	2.0274	0.0103936	0	0.0339689	0	0	0.650469	0.0247824	0.348414	0.870473	0.0340988	0	34.8804	46.5654	18.6382	34.7964	3.22858	811.115
20ss032-2-4-1cpx	this paper	xiqiaoshan	50.719	0.293	0.533	0	20.975	0.779	4.711	20.411	0.452	0.004	98.877	T2	m	2.03557	0.00884668	0	0.0252114	0	0	0.708931	0.0264813	0.281864	0.877716	0.0351721	0.000204801	28.4483	46.9741	15.0849	37.941	2.4117	831.268
20ss032-2-4-2cpx	this paper	xiqiaoshan	50.354	0.438	0.197	0	26.144	0.857	1.194	14.163	3.34	0	96.687	T3	m	2.08073	0.0136161	0	0.00959408	0	0.0744676	0.823387	0.029995	0.0735525	0.627064	0.267592	0	7.57175	39.229	4.60143	56.1696
20ss032-2-4-3cpx	this paper	xiqiaoshan	51.343	0.352	0.746	0.034	19.073	0.701	5.891	20.515	0.429	0	99.084	T2	inclusion	2.03757	0.0105092	0	0.0348919	0.0010668	0	0.638548	0.0235632	0.348522	0.872321	0.033009	0	35.3088	46.9143	18.7439	34.3418
20ss032-2-5-2cpx	this paper	xiqiaoshan	51.359	0.344	0.751	0.004	18.363	0.724	6.363	20.642	0.455	0	99.005	T2	m	2.03247	0.0102415	0	0.0350269	0.000125153	0	0.612318	0.0242679	0.375388	0.875252	0.0349111	0	38.006	46.9819	20.1501	32.868
20ss017-3-1-1cpx	this paper	yigang	50.542	0.719	0.754	0	22.816	0.88	3.536	20.123	0.392	0.003	99.765	T2	m	2.03021	0.0217278	0	0.0356957	0	0	0.773918	0.0299404	0.211745	0.866076	0.0305295	0.000153733	21.4825	46.771	11.4349	41.7941
20ss017-3-1-2cpx	this paper	yigang	50.171	0.611	0.578	0	24.658	1.204	2.339	18.931	0.621	0.027	99.14	T2	g	2.04456	0.0187321	0	0.0277607	0	0	0.848216	0.0415586	0.142098	0.8266	0.0490664	0.00140368	14.3488	45.4947	7.82086	46.6844	2.89338	813.736
20ss017-3-2-6cpx	this paper	yigang	50.23	0.659	0.701	0.001	22.785	0.814	2.995	20.281	0.407	0.002	98.875	T2	m	2.03998	0.0201347	0	0.0335533	3.21097e-05	0	0.782297	0.028001	0.18133	0.882522	0.032048	0.000103621	18.8175	47.8034	9.82207	42.3745	2.50035	876.593
20ss017-3-3-5cpx	this paper	yigang	50.41	0.741	0.832	0	22.68	0.887	3.145	20.372	0.421	0	99.488	T2	g	2.03272	0.0224789	0	0.0395402	0	0	0.772825	0.0302949	0.189056	0.880173	0.0329145	0	19.6549	47.7821	10.2634	41.9545	2.46135	879.025
20ss017-3-3-6cpx	this paper	yigang	49.81	0.609	0.521	0	24.697	1.098	2.164	18.991	0.619	0.055	98.564	T2	g	2.04364	0.0187976	0	0.025193	0	0	0.854881	0.0381572	0.13236	0.834852	0.0492405	0.00287877	13.407	45.8183	7.26416	46.9175
20ss017-3-3-7cpx	this paper	yigang	48.262	0.675	0.682	0.003	22.341	0.826	3.306	20.085	0.433	0.008	96.621	T2	m	2.00386	0.0210845	0	0.0333734	9.8482e-05	0	0.779095	0.0290488	0.204633	0.893527	0.0348573	0.000423748	20.8018	47.5975	10.9006	41.5018
20ss025-1-2-2cpx	this paper	zidong	47.471	4.259	5.804	0.019	7.802	0.164	11.736	21.886	0.512	0	99.653	B1	C	1.78875	0.120733	0.211252	0.0465001	0.000566041	0	0.246698	0.0052342	0.659252	0.883611	0.0374055	0	72.7691	49.3758	36.8388	13.7854	5.27575	1108.29
20ss025-1-4-1cpx	this paper	zidong	48.173	4.183	5.055	0.031	9.032	0.209	11.01	22.066	0.571	0	100.33	B1	C	1.81281	0.118581	0.187194	0.037301	0.000923561	0	0.285427	0.00667056	0.618483	0.890897	0.0417167	0	68.4231	49.6375	34.4596	15.9029	4.5401	1084.44
14ss003-2-01	Yuan,2019	zoumaying	48.487	0.465	0.716	0	22.015	0.908	5.68	21.081	0.485	0.045	99.882	T2	C	1.92586	0.0138947	0.0335171	0	0	0.133299	0.589786	0.0305471	0.336324	0.897147	0.0373495	0.00228017	31.7464	45.8534	17.1896	36.957
14ss003-2-02	Yuan,2019	zoumaying	48.325	0.522	0.72	0.042	21.38	0.985	6.036	20.953	0.515	0.028	99.506	T2	inclusion	1.92272	0.0156001	0.0337092	0	0.00131912	0.138184	0.56496	0.0331423	0.357454	0.891827	0.0396654	0.00141898	33.7031	45.6779	18.3082	36.0138
14ss003-2-03	Yuan,2019	zoumaying	42.568	0.968	0.808	5.264	21.957	0.832	4.366	19.255	1.143	0.325	97.486	T2	m	1.76021	0.030113	0.0393774	0	0.172096	0.328466	0.40958	0.0291401	0.269138	0.853098	0.0916372	0.0171443	26.7219	45.8585	14.4676	39.6739
14ss003-5-01	Yuan,2019	zoumaying	51.401	0.435	0.232	0.024	32.938	0.27	0.064	1.904	12.119	0.042	99.429	T4	m	1.99073	0.0126744	0.00927286	0.00131682	0.000734895	0.900971	0.0806451	0.00885707	0.00369514	0.0790098	0.910021	0.00207513	0.375023	7.4235	0.347183	92.2293
14ss003-7-01	Yuan,2019	zoumaying	46.313	0.378	0.381	0.029	29.166	1.189	1.436	19.898	0.668	0.029	99.487	T2	m	1.91279	0.011745	0.0185457	0	0.000946969	0.200034	0.790374	0.0415941	0.0884157	0.880537	0.0534915	0.00152798	8.19556	44.94	4.51248	50.5475
14ss003-7-02	Yuan,2019	zoumaying	45.584	0.321	0.296	0.059	30.189	1.182	0.779	19.238	0.95	0.029	98.627	T2	m	1.90726	0.0101041	0.0145963	0	0.00195174	0.24401	0.790542	0.0418891	0.0485898	0.862445	0.0770664	0.00154793	4.48601	44.3283	2.49744	53.1743
14ss003-7-03	Yuan,2019	zoumaying	47.171	0.494	0.464	0.021	27.916	1.175	2.226	20.406	0.663	0.049	100.585	T2	m	1.91343	0.0150751	0.0221824	0	0.000673488	0.186751	0.745349	0.0403701	0.134608	0.886887	0.0521428	0.00253565	12.6191	45.3977	6.89029	47.712
14ss003-7-06	Yuan,2019	zoumaying	46.606	0.408	0.406	0.038	29.843	1.221	1.107	19.903	0.852	0.039	100.423	T2	m	1.90954	0.012576	0.019605	0	0.00123096	0.21948	0.784132	0.0423728	0.0676152	0.873733	0.0676815	0.00203848	6.31194	44.9229	3.47643	51.6007
14ss003-7-08	Yuan,2019	zoumaying	46.032	0.508	0.353	0	29.46	1.129	1.035	19.561	0.838	0.043	98.959	T2	m	1.91447	0.0158946	0.0173029	0	0	0.205999	0.800863	0.0397712	0.0641711	0.871674	0.0675736	0.00228146	5.99152	44.869	3.30318	51.8278
14ss003-7-09	Yuan,2019	zoumaying	46.54	0.511	0.373	0.029	30.146	1.216	0.854	19.259	0.954	0.036	99.918	T2	m	1.91918	0.0158529	0.0181282	0	0.000945501	0.203314	0.818496	0.0424727	0.0524999	0.850938	0.0762751	0.00189387	4.88685	44.1989	2.72692	53.0742
14ss003-7-12	Yuan,2019	zoumaying	46.757	0.375	0.271	0.027	30.275	1.195	0.533	18.508	1.098	0.024	99.063	T2	m	1.94567	0.0117395	0.0132906	0	0.0008883	0.173708	0.86447	0.0421188	0.0330643	0.825193	0.0885867	0.00127406	3.08654	43.5128	1.7435	54.7437
14ss003-7-16	Yuan,2019	zoumaying	47.379	0.401	0.272	0.034	30.102	1.112	0.655	19.579	0.975	0.016	100.525	T2	m	1.94078	0.0123575	0.0131315	0	0.00110114	0.170061	0.846395	0.0385817	0.0399984	0.859321	0.0774354	0.000836117	3.7861	44.855	2.08785	53.0571
14ss003-7-17	Yuan,2019	zoumaying	46.64	0.344	0.297	0	29.736	1.125	0.902	19.292	0.946	0.037	99.319	T2	m	1.93196	0.01072	0.0144994	0	0	0.191564	0.821918	0.0394711	0.0557003	0.856232	0.0759759	0.00195523	5.20961	44.47	2.8929	52.6371
14sszd-S2-04	Yuan,2019	zidong	51.05	1.229	2.056	0.203	10.104	0.28	14.106	20.992	0.482	0.009	100.511	B1	g	1.89677	0.0343532	0.090032	0	0.00596333	0.078453	0.233446	0.00881177	0.781328	0.835693	0.0347224	0.000426597	71.4699	43.3244	40.506	16.1696	8.4	1152.62
14sszd-S2-38	Yuan,2019	zidong	49.588	1.301	2.678	0	10.169	0.226	13.653	20.916	0.401	0.045	98.977	B1	g	1.87214	0.0369519	0.119159	0	0	0.0959814	0.222508	0.00722698	0.768424	0.846087	0.0293529	0.00216736	70.6978	43.7706	39.7529	16.4764	8.7	1146.54
14sszd-N-01	Yuan,2019	zidong	45.667	2.896	6.936	0.001	12.515	0.36	11.234	19.385	0.713	0.023	99.73	B1	g	1.72958	0.0825153	0.270416	0.0391859	2.99442e-05	0.122446	0.269876	0.0115486	0.634285	0.786646	0.0523568	0.00111128	61.7846	43.3831	34.9805	21.6364	10.7074	1146.71
14sszd-N-02	Yuan,2019	zidong	47.39	1.998	5.39	0.31	10.141	0.279	12.706	20.905	0.621	0.006	99.746	B1	g	1.77715	0.0563676	0.222851	0.0153705	0.00919121	0.133048	0.181432	0.00886191	0.710324	0.839965	0.0451516	0.000287042	69.3131	45.0439	38.0918	16.8643	6.68774	1146.41
14sszd-N-06	Yuan,2019	zidong	49.499	1.547	3.624	0	10.677	0.21	13.416	20.567	0.687	0.071	100.298	B1	r	1.84339	0.043342	0.156606	0.00245548	0	0.122596	0.20651	0.0066241	0.744827	0.820667	0.0496047	0.00337316	69.355	43.3161	39.3132	17.3708	4.65226	1125.89
14ss-012-03	Yuan,2019	wangjiegang	46.575	2.977	5.373	0.054	9.04	0.253	11.931	22.988	0.646	0.036	99.873	B1	r	1.74789	0.0840497	0.237647	0	0.00160224	0.147278	0.132924	0.00804205	0.667495	0.924348	0.0470043	0.00172353	70.4334	49.3764	35.6559	14.9677	7.6	1019.77
14ss-012-04	Yuan,2019	wangjiegang	47.55	1.728	7.839	0.445	6.926	0.106	13.796	21.298	0.596	0.018	100.302	B1	m	1.74754	0.0477769	0.252457	0.0870845	0.0129304	0.101143	0.109925	0.00329966	0.75586	0.838668	0.0424686	0.00084393	78.1713	46.4483	41.8621	11.6897	8.73965	1178.08
14ss-012-05	Yuan,2019	wangjiegang	50.194	0.74	5.052	0.928	6.496	0.13	16.689	19.013	0.564	0.019	99.825	B1	m	1.83672	0.0203713	0.163282	0.0545933	0.026848	0.0828012	0.114613	0.00402921	0.910399	0.745444	0.0400142	0.000886953	82.1798	40.2235	49.1242	10.6523	10.1726	1191.68
14ss-012-06	Yuan,2019	wangjiegang	48.857	1.408	6.881	0.54	7.214	0.156	14.627	20.155	0.685	0.024	100.547	B1	m	1.78744	0.0387529	0.212561	0.0841341	0.0156197	0.0859785	0.133153	0.00483409	0.797756	0.790062	0.0485891	0.00112014	78.4508	43.7235	44.1493	12.1271	11.434	1195.17
14ss-012-07	Yuan,2019	wangjiegang	48.329	1.88	5.325	0.218	6.779	0.166	13.848	23.189	0.531	0.014	100.279	B1	c	1.78212	0.0521534	0.217884	0.0135374	0.00635563	0.13314	0.0735713	0.00518469	0.761248	0.916188	0.0379636	0.000658586	78.6446	48.6261	40.4028	10.9711	8.20608	1131.72
14ss-012-10	Yuan,2019	wangjiegang	50.591	0.726	5.076	0.423	6.675	0.189	17.024	18.992	0.443	0.002	100.141	B1	m	1.84385	0.019906	0.156154	0.0618813	0.0121889	0.0744714	0.127715	0.00583444	0.924961	0.741645	0.031304	9.29903e-05	82.0621	39.6858	49.4951	10.8191	8.4824	1175.44
14ss-012-11	Yuan,2019	wangjiegang	46.999	2.083	7.487	0.252	8.116	0.149	13.63	20.637	0.671	0.001	100.025	B1	m	1.73804	0.0579506	0.261957	0.0643567	0.00736795	0.1238	0.12459	0.00466707	0.751413	0.817697	0.0481104	4.71768e-05	75.1561	44.9902	41.3432	13.6666	10.6607	1199.38
14ss-012-12	Yuan,2019	wangjiegang	48.386	1.396	6.848	0.536	7.193	0.129	14.728	20.362	0.576	0.018	100.172	B1	m	1.77697	0.0385694	0.223031	0.0733697	0.0155632	0.0998242	0.119245	0.00401269	0.806333	0.801225	0.0410135	0.000843314	78.6358	43.8636	44.1433	11.9931	10.1973	1182.34
14ss-012-13	Yuan,2019	wangjiegang	49.573	0.868	5.82	0.837	6.856	0.199	16.11	19.483	0.597	0.036	100.379	B1	m	1.80193	0.0238895	0.198067	0.0528716	0.0242097	0.107148	0.0993861	0.00616636	0.878609	0.763694	0.0423456	0.00168015	80.9671	41.3067	47.5223	11.171	10.5363	1193.37
14ss-012-14	Yuan,2019	wangjiegang	47.764	1.767	7.396	0.652	6.773	0.167	13.883	21.375	0.838	0.049	100.664	B1	m	1.74714	0.048625	0.252862	0.0659821	0.0188559	0.133304	0.0715627	0.00517403	0.757043	0.837735	0.0594312	0.00228654	78.7021	46.55	42.0662	11.3837	12.6122	1196.14
14ss-012-15	Yuan,2019	wangjiegang	47.44	3.007	4.478	0.11	8.138	0.178	12.471	22.717	0.518	0.035	99.092	B1	r	1.79095	0.085402	0.19924	0	0.00328325	0.0856085	0.169481	0.00569172	0.701859	0.918888	0.0379151	0.00168563	73.3434	48.9855	37.4158	13.5987	6.5	1070.86
14ss-012-16	Yuan,2019	wangjiegang	49.305	0.955	5.972	0.812	6.971	0.159	15.894	18.668	0.644	0.024	99.404	B1	c	1.81594	0.0264613	0.184056	0.0751748	0.0236451	0.0803302	0.132944	0.00496015	0.872681	0.736688	0.0459877	0.00112766	80.3606	40.4186	47.88	11.7014	11.3204	1204.07
14ss-012-17	Yuan,2019	wangjiegang	47.17	2.18	6.4	0.333	7.214	0.084	13.353	22.495	0.583	0.016	99.828	B1	c	1.75007	0.0608476	0.249927	0.0299224	0.00976806	0.13224	0.0891055	0.00263971	0.73855	0.894232	0.0419375	0.000757298	76.9407	48.2293	39.8327	11.938	7.06779	1153.99
14ss-012-20	Yuan,2019	wangjiegang	43.821	3.859	8.794	0.101	8.148	0.231	11.774	22.306	0.564	0.017	99.615	B1	m	1.64337	0.108874	0.356629	0.0320532	0.00299467	0.146977	0.105404	0.00733755	0.658246	0.896291	0.0410088	0.000813315	72.2849	49.6033	36.4292	13.9675	9.86003	1108.1
14ss-012-21	Yuan,2019	wangjiegang	47.192	3.181	5.1	0.072	8.198	0.17	12.862	23.175	0.532	0.01	100.492	B1	m	1.7539	0.0889398	0.223388	0	0.00211564	0.128985	0.123055	0.00535144	0.712614	0.922846	0.0383346	0.000474124	73.8725	48.8925	37.7544	13.3531	6.56805	1057.29
14ss-012-22	Yuan,2019	wangjiegang	46.978	3.408	5.381	0.061	8.096	0.219	12.151	22.97	0.523	0.038	99.825	B1	m	1.76231	0.0961796	0.237695	0.000210958	0.00180922	0.0843692	0.167828	0.00695852	0.679531	0.923255	0.0380393	0.00181856	72.9323	49.7716	36.6327	13.5957	4.43894	1106.45
14ss004-2-01	Yuan,2019	shitoucun	48.375	1.733	4.689	0.058	9.411	0.149	13.644	21.859	0.494	0.007	100.419	B1	c	1.79369	0.0483418	0.20491	0	0.00170031	0.146934	0.141282	0.0046795	0.754189	0.868424	0.0355139	0.000331117	72.3508	45.4475	39.4692	15.0833
14ss004-2-07	Yuan,2019	shitoucun	49.263	1.361	3.935	0.144	8.608	0.224	15.106	21.185	0.541	0.022	100.389	B1	m	1.81408	0.0377043	0.170779	0	0.00419249	0.162497	0.0989642	0.00698666	0.829269	0.835868	0.0386257	0.00103351	76.0288	43.3857	43.0432	13.5711
14ss004-2-08	Yuan,2019	shitoucun	44.801	3.125	7.316	0.195	10.023	0.231	12.561	21.168	0.573	0.012	100.005	B1	m	1.67627	0.0879638	0.322616	0	0.00576853	0.187237	0.121431	0.00732074	0.700635	0.848615	0.0415677	0.000572789	69.4177	45.6756	37.7108	16.6136	5.06145	1103.87
14ss004-2-09	Yuan,2019	shitoucun	45.266	3.035	6.83	0	10.171	0.192	12.616	21.229	0.516	0.028	99.883	B1	m	1.69645	0.0855704	0.301678	0	0	0.175209	0.138859	0.00609474	0.704856	0.852455	0.037494	0.0013387	69.1765	45.5523	37.6651	16.7827	4.15885	1098.87
14ss004-2-10	Yuan,2019	shitoucun	46.235	2.351	6.509	0.336	9.086	0.145	13.333	21.685	0.562	0.01	100.252	B1	m	1.71626	0.0656542	0.283736	0.00102585	0.00986112	0.183943	0.093738	0.00455897	0.737822	0.862475	0.0404477	0.000473554	72.6558	45.9257	39.2881	14.7862	6.81494	1132.37
14ss004-2-11	Yuan,2019	shitoucun	48.793	1.397	4.19	0.225	8.628	0.206	14.746	21.14	0.481	0.013	99.819	B1	m	1.8098	0.0389821	0.183164	0	0.00659824	0.149354	0.114915	0.0064718	0.815374	0.840139	0.0345909	0.000615137	75.5226	43.7622	42.4722	13.7656	2.85077	1097.67
14ss004-2-12	Yuan,2019	shitoucun	49.637	1.404	3.799	0.212	9.191	0.2	14.964	20.55	0.435	0.008	100.4	B1	c	1.8274	0.0391541	0.165973	0	0.00621331	0.116512	0.163688	0.00627956	0.826935	0.816204	0.0312641	0.00037832	74.6914	42.4368	42.9948	14.5684	3.12787	1104.33
14ss011-07	Yuan,2019	jiangbian	43.693	2.908	10.575	0.045	8.409	0.166	11.65	21.941	0.759	0.016	100.162	B1	r	1.62112	0.08117	0.378876	0.083547	0.00132005	0.188136	0.0686371	0.00521673	0.644378	0.872238	0.0545997	0.000757322	71.5061	49.1848	36.336	14.4792	10.9107	1135.02
14ss011-08	Yuan,2019	jiangbian	45.064	2.742	9.608	0.242	7.082	0.088	12.11	22.241	0.716	0.006	99.899	B1	m	1.6713	0.076505	0.328698	0.0912672	0.00709601	0.130059	0.0871944	0.00276436	0.669545	0.883799	0.0514852	0.000283879	75.5014	49.9153	37.8146	12.2701	10.2453	1153.36
14ss011-09	Yuan,2019	jiangbian	43.893	4.189	9.925	0	6.766	0.15	12.095	22.25	0.701	0.021	99.99	B1	m	1.62982	0.117018	0.370179	0.0641611	0	0.124328	0.0835826	0.00471761	0.669516	0.885215	0.0504669	0.000994765	76.3045	50.2209	37.9837	11.7954	10.1254	1150.79
14ss011-10	Yuan,2019	jiangbian	44.009	3.236	10.49	0.166	7.637	0.144	11.727	22.322	0.746	0.023	100.5	B1	m	1.62642	0.08997	0.373576	0.0833254	0.00485036	0.160988	0.0718433	0.00450755	0.646085	0.883892	0.0534534	0.00108437	73.5093	50.1411	36.6509	13.208	10.4612	1124.23
14ss011-11	Yuan,2019	jiangbian	45.289	2.834	9.595	0.241	7.156	0.116	12.097	22.354	0.66	0	100.342	B1	c	1.67414	0.0788125	0.325863	0.0921581	0.00704351	0.117353	0.10169	0.00363197	0.666633	0.885376	0.0473028	0	75.2683	49.9915	37.6405	12.3679	9.66633	1147.1
57	Zhang,2019	wangjiegang	49.556	1.876	3.043	0.032	10.51	0.267	13.673	20.613	0.448	0.019	100.037	B4	r	1.8544	0.0528126	0.134204	0	0.000946742	0.0855735	0.240977	0.00846262	0.76275	0.826462	0.0325035	0.000907022	70.022	43.1401	39.8144	17.0454	7.3	1137.92
56	Zhang,2019	wangjiegang	49.52	1.613	4.106	0.069	9.933	0.285	13.56	20.236	0.557	0	99.879	B4	r	1.84942	0.0453195	0.150584	0.0301446	0.0020374	0.0694951	0.238942	0.0090154	0.754961	0.809753	0.0403323	0	70.9951	43.2295	40.3043	16.4662	6.36146	1172.31
55	Zhang,2019	wangjiegang	49.796	1.55	3.238	0	9.605	0.218	13.812	20.434	0.557	0.033	99.243	B4	r	1.86935	0.0437749	0.13065	0.0126109	0	0.0740197	0.225661	0.00693168	0.772971	0.821909	0.0405411	0.0015804	72.0617	43.3825	40.7995	15.818	3.75653	1140.26
54	Zhang,2019	wangjiegang	48.666	1.807	5.212	0.031	9.615	0.204	13.327	19.94	0.632	0.02	99.454	B4	r	1.82199	0.050895	0.178012	0.0519623	0.000917604	0.0715462	0.227698	0.00646898	0.743812	0.799869	0.0458755	0.000955226	71.3108	43.4022	40.3604	16.2375	8.56881	1179.33
53	Zhang,2019	wangjiegang	48.768	1.884	5.314	0.072	9.903	0.223	13.43	19.765	0.658	0.007	100.024	B4	r	1.81621	0.0527847	0.183795	0.0494468	0.00212	0.0759804	0.230491	0.0070343	0.745618	0.78868	0.0475116	0.000332571	70.8702	42.8451	40.5058	16.6491	8.91271	1180.78
52	Zhang,2019	wangjiegang	48.837	1.896	5.509	0.053	9.633	0.265	13.45	19.904	0.639	0.005	100.191	B4	r	1.81459	0.0529986	0.18541	0.0558342	0.00155697	0.0696299	0.22796	0.00833991	0.745011	0.792399	0.0460336	0.000237004	71.457	43.1825	40.6	16.2174	8.88866	1180.53
51	Zhang,2019	wangjiegang	48.781	1.974	5.439	0.035	9.591	0.197	13.395	20.061	0.779	0.026	100.278	B4	r	1.80943	0.0550851	0.190574	0.0472001	0.00102644	0.091003	0.204249	0.00618931	0.740702	0.797291	0.0560237	0.00123033	71.4995	43.4907	40.4039	16.1054	9.77401	1186.55
50	Zhang,2019	wangjiegang	48.527	1.837	5.418	0.027	9.657	0.232	13.523	20.015	0.667	0	99.903	B4	r	1.80696	0.05146	0.193044	0.0447259	0.00079488	0.0943868	0.203959	0.00731708	0.750668	0.798534	0.0481542	0	71.5594	43.2213	40.6305	16.1482	8.76504	1181.54
49	Zhang,2019	wangjiegang	48.374	1.964	5.515	0.027	9.324	0.226	13.461	19.843	0.718	0	99.452	B4	r	1.80791	0.0552208	0.192091	0.0508299	0.000797815	0.0835013	0.205888	0.00715417	0.749985	0.794595	0.0520275	0	72.1573	43.3265	40.8941	15.7794	9.43642	1185.8
48	Zhang,2019	wangjiegang	48.313	1.872	5.479	0.013	9.489	0.188	13.151	19.967	1.029	0.017	99.518	B4	r	1.80246	0.0525418	0.197539	0.0433726	0.000383459	0.125729	0.167206	0.00594081	0.731428	0.798158	0.0744323	0.000809109	71.4032	43.7942	40.1328	16.0731	11.6064	1188.95
47	Zhang,2019	wangjiegang	48.871	1.908	5.283	0.013	9.106	0.19	13.349	20.447	0.606	0	99.773	B4	r	1.82245	0.0535279	0.177547	0.0546415	0.000383285	0.0604104	0.222142	0.00600129	0.742104	0.816975	0.0438149	0	72.4247	44.3615	40.296	15.3425	8.0388	1174.83
46	Zhang,2019	wangjiegang	48.214	1.862	5.54	0.083	9.096	0.152	13.456	20.065	0.861	0.013	99.342	B4	r	1.80041	0.0523088	0.19959	0.0442261	0.00245047	0.112867	0.168502	0.00480759	0.749074	0.802808	0.062337	0.000619296	72.6944	43.7915	40.8604	15.3481	10.4112	1194.11
45	Zhang,2019	wangjiegang	49.158	1.675	5.246	0.063	8.822	0.179	13.844	20.16	0.698	0.019	99.864	B4	r	1.82492	0.04678	0.175084	0.0544415	0.00184911	0.0776477	0.194464	0.00562843	0.766162	0.801887	0.0502398	0.000899826	73.7919	43.577	41.6356	14.7874	10.3418	1157.89
44	Zhang,2019	wangjiegang	49.494	1.471	4.794	0.102	8.597	0.2	14.023	19.953	0.982	0.031	99.647	B4	r	1.83686	0.041012	0.163137	0.0462524	0.00298865	0.107733	0.156686	0.00627795	0.774735	0.79229	0.0705598	0.00146561	74.5544	43.2604	42.3019	14.4377	11.7766	1172.22
43	Zhang,2019	wangjiegang	49.003	1.661	5.34	0.205	8.257	0.252	14.027	20.262	0.656	0.006	99.669	B4	r	1.82026	0.0464169	0.179744	0.0540348	0.00602057	0.0755275	0.179356	0.0079286	0.776757	0.806429	0.0472452	0.000284327	75.2934	43.8737	42.2594	13.8669	9.92652	1153.03
42	Zhang,2019	wangjiegang	48.834	1.615	5.749	0.25	7.948	0.203	14.025	20.202	0.585	0.005	99.416	B4	r	1.81704	0.0452076	0.18296	0.0691495	0.00735455	0.0594142	0.186681	0.00639771	0.777957	0.805398	0.0422029	0.000237339	75.9685	44.0241	42.5241	13.4518	9.23451	1146.54
41	Zhang,2019	wangjiegang	49.237	1.69	5.529	0.251	8.153	0.211	14.119	20.3	0.698	0.017	100.205	B4	z1	1.81768	0.0469364	0.182321	0.0582415	0.00732611	0.074747	0.175392	0.00659772	0.777035	0.802964	0.0499603	0.000800628	75.6478	43.8745	42.4577	13.6678	10.3476	1157.46
40	Zhang,2019	wangjiegang	46.508	2.461	7.514	0	9.182	0.194	12.69	19.71	0.713	0.007	98.979	B4	z1	1.74792	0.0695827	0.252084	0.0807428	0	0.0859232	0.200598	0.00617562	0.710993	0.793695	0.0519549	0.00033562	71.2765	44.3106	39.6935	15.996	10.859	1176.34
39	Zhang,2019	wangjiegang	48.987	1.717	5.353	0.256	8.491	0.175	13.674	20.386	0.648	0.006	99.693	B4	z1	1.82289	0.0480671	0.177107	0.0576577	0.00753172	0.0638902	0.198941	0.00551575	0.758554	0.812805	0.0467519	0.000284831	74.2672	44.3141	41.3563	14.3296	9.82285	1150.18
38	Zhang,2019	wangjiegang	47.547	2.279	6.555	0.134	8.979	0.185	13.051	20.102	0.686	0.022	99.54	B4	z1	1.77643	0.0640569	0.223572	0.0650649	0.00395825	0.0785031	0.200207	0.0058544	0.726907	0.804707	0.0496927	0.00104858	72.2847	44.451	40.1534	15.3956	9.73939	1176.84
37	Zhang,2019	wangjiegang	47.636	2.176	7.011	0.245	8.529	0.195	13.318	19.988	0.681	0	99.779	B4	z1	1.77126	0.0608698	0.228744	0.0784979	0.00720254	0.071558	0.192075	0.00614139	0.738237	0.796323	0.049095	0	73.6859	44.2846	41.0544	14.661	10.4816	1160.33
36	Zhang,2019	wangjiegang	47.999	1.528	5.992	0.573	7.473	0.205	13.791	19.823	1.671	0.059	99.114	B4	z1	1.77625	0.0425394	0.223754	0.0375811	0.0167648	0.207362	0.019852	0.00642556	0.760812	0.785985	0.119892	0.00278535	77.0032	44.3055	42.8865	12.8079	12.9417	1182.75
35	Zhang,2019	wangjiegang	48.772	1.615	6.057	0.468	7.504	0.168	14.2	20.005	0.75	0.016	99.555	B4	z1	1.80716	0.0450188	0.192845	0.0716623	0.0137102	0.0730449	0.158065	0.00527254	0.784375	0.794214	0.0538804	0.000756312	77.2414	43.8865	43.3429	12.7706	11.0066	1165.24
34	Zhang,2019	wangjiegang	49.277	1.287	5.799	0.591	7.201	0.161	15.022	19.38	0.702	0.014	99.434	B4	z1	1.82154	0.0357906	0.178464	0.0741752	0.0172725	0.0672815	0.154079	0.00504087	0.827812	0.767576	0.0503124	0.000660204	78.9014	42.25	45.5656	12.1844	10.6884	1167.79
33	Zhang,2019	wangjiegang	49.374	1.204	5.432	0.716	7.084	0.203	14.918	19.563	0.715	0.02	99.229	B4	z1	1.82998	0.0335715	0.170021	0.0672597	0.0209814	0.0678231	0.15051	0.00637279	0.824269	0.776886	0.0513805	0.000945658	79.0588	42.698	45.3023	11.9997	10.7317	1166.12
32	Zhang,2019	wangjiegang	49.664	1.155	5.43	0.704	7.031	0.211	15.233	19.447	0.641	0.022	99.538	B4	z1	1.83372	0.0320826	0.166283	0.0700067	0.0205512	0.0592656	0.156765	0.00659871	0.838468	0.769338	0.0458873	0.00103626	79.5134	42.1824	45.9728	11.8448	10.0132	1160.76
31	Zhang,2019	wangjiegang	49.628	1.045	5.926	0.78	6.838	0.155	15.836	18.8	0.548	0	99.556	B4	z1	1.82698	0.0289415	0.173018	0.0840946	0.0227026	0.048105	0.161573	0.00483309	0.869088	0.741548	0.039114	0	80.5631	40.7374	47.7438	11.5188	9.20447	1158.07
30	Zhang,2019	wangjiegang	49.366	1.285	6.498	0.643	7.009	0.174	15.21	18.629	0.622	0.03	99.466	B4	z1	1.82307	0.0356609	0.176929	0.105576	0.0187533	0.0294563	0.186482	0.0054366	0.836435	0.736302	0.0444864	0.00141179	79.4808	41.1646	46.7628	12.0726	10.1742	1166.82
29	Zhang,2019	wangjiegang	49.052	1.382	6.2	0.697	6.938	0.209	15.178	18.84	0.927	0.057	99.48	B4	z1	1.80722	0.0383053	0.19278	0.0764364	0.020303	0.0892546	0.122919	0.00652209	0.833642	0.74372	0.0662184	0.00267908	79.7121	41.5594	46.5843	11.8564	12.7889	1191.79
28	Zhang,2019	wangjiegang	49.373	1.292	6.157	0.584	7.224	0.181	15.083	19.227	0.644	0.022	99.787	B4	z1	1.81864	0.0358028	0.18136	0.0859294	0.0170076	0.0546098	0.166911	0.00564705	0.828239	0.758827	0.0459925	0.0010338	78.898	41.9569	45.7948	12.2483	10.1876	1164.22
27	Zhang,2019	wangjiegang	48.99	1.236	6.152	0.666	6.549	0.165	14.694	19.698	0.793	0.026	98.969	B4	z1	1.81673	0.0344825	0.183268	0.0856093	0.0195268	0.0681822	0.133765	0.00518267	0.812333	0.782672	0.0570165	0.00123002	80.0896	43.5555	45.2062	11.2383	11.4966	1171.7
26	Zhang,2019	wangjiegang	51.418	0.659	4.079	0.6	6.445	0.09	16.553	19.231	0.508	0.025	99.608	B4	z2	1.88783	0.0182025	0.112169	0.0643359	0.017417	0.0317851	0.165586	0.00279883	0.906015	0.756526	0.0361623	0.00117097	82.1122	40.6754	48.7128	10.6119	7.37896	1228.01
25	Zhang,2019	wangjiegang	50.985	0.77	4.394	0.688	6.106	0.138	16.137	19.443	0.688	0.057	99.406	B4	z2	1.87472	0.0213001	0.125284	0.0651338	0.0200012	0.0498456	0.137138	0.00429792	0.884558	0.766003	0.0490485	0.00267377	82.5501	41.6862	48.1381	10.1757	9.0009	1242.47
24	Zhang,2019	wangjiegang	50.777	0.878	4.512	0.64	6.337	0.158	16.106	19.075	0.604	0.03	99.117	B4	z2	1.87476	0.0243876	0.125244	0.0710923	0.0186823	0.0317799	0.163373	0.00494107	0.886494	0.754599	0.0432373	0.00141304	81.9578	41.0947	48.2775	10.6278	8.59834	1233.96
23	Zhang,2019	wangjiegang	51.064	0.824	4.275	0.64	6.124	0.135	16.229	19.366	0.709	0.075	99.441	B4	z2	1.8764	0.0227789	0.123605	0.0615354	0.0185936	0.0525417	0.134828	0.00420174	0.889021	0.762471	0.0505126	0.00351582	82.5928	41.4643	48.3463	10.1894	9.07666	1243.08
22	Zhang,2019	wangjiegang	50.865	0.764	4.774	0.539	6.581	0.131	16.034	19.124	0.593	0.022	99.427	B4	z2	1.8724	0.0211577	0.127603	0.0795142	0.0156871	0.0339204	0.168105	0.00408447	0.879896	0.754278	0.0423231	0.00103314	81.3272	41.0782	47.9194	11.0024	9.45407	1157.4
21	Zhang,2019	wangjiegang	51.16	0.717	4.675	0.802	6.105	0.142	15.982	19.296	0.609	0.025	99.513	B4	z2	1.88131	0.0198357	0.118688	0.0839252	0.0233173	0.0166039	0.170888	0.00442288	0.876137	0.760277	0.0434202	0.00117281	82.3724	41.684	48.0363	10.2797	8.86681	1239.4
20	Zhang,2019	wangjiegang	51.275	0.812	4.684	0.799	6.101	0.126	16.279	19.166	0.557	0.035	99.834	B4	z2	1.87873	0.0223826	0.121271	0.0809982	0.0231462	0.0137655	0.172971	0.00391034	0.889195	0.752426	0.0395693	0.001636	82.6442	41.1531	48.6335	10.2133	8.36663	1233.71
19	Zhang,2019	wangjiegang	50.394	1.012	5.532	0.914	6.597	0.157	15.186	18.945	0.674	0.106	99.517	B4	z2	1.85918	0.0280879	0.140823	0.0997127	0.0266601	0.0116605	0.191685	0.004906	0.835211	0.748877	0.048211	0.00498889	80.4204	41.8968	46.7268	11.3764	10.5051	1166.28
18	Zhang,2019	wangjiegang	48.536	1.648	6.209	0.547	7.068	0.186	13.924	20.693	0.557	0.029	99.397	B4	z2	1.80408	0.0460835	0.195923	0.0760766	0.0160751	0.0538668	0.164856	0.00585585	0.771553	0.824117	0.0401412	0.00137514	77.913	45.4211	42.5241	12.0549	8.8731	1138.55
17	Zhang,2019	wangjiegang	48.389	1.656	6.346	0.6	7.214	0.104	14.064	20.697	0.582	0	99.652	B4	c	1.7931	0.0461652	0.206902	0.0702459	0.0175785	0.0694564	0.152806	0.0032642	0.776921	0.821748	0.0418143	0	77.7556	45.1279	42.6661	12.206	9.18278	1143.38
16	Zhang,2019	wangjiegang	48.225	1.69	6.265	0.604	7.148	0.19	14.012	20.673	0.621	0.038	99.466	B4	c	1.79273	0.0471346	0.207274	0.0664625	0.0177038	0.0807266	0.139997	0.00596618	0.774404	0.821172	0.0446367	0.0017972	77.8196	45.2113	42.6364	12.1524	9.61822	1147.02
15	Zhang,2019	wangjiegang	48.5	1.401	5.637	0.648	6.925	0.155	14.155	20.563	0.747	0.026	98.757	B4	c	1.80963	0.0393264	0.190365	0.057521	0.019116	0.0913036	0.123132	0.00489854	0.787354	0.822072	0.0540398	0.0012376	78.5948	45.0732	43.1696	11.7572	10.8222	1157.95
14	Zhang,2019	wangjiegang	49.166	1.489	5.802	0.542	7.119	0.198	14.354	20.574	0.576	0.023	99.843	B4	c	1.81702	0.0413988	0.182976	0.0697369	0.0158368	0.0577455	0.161221	0.00619793	0.790823	0.814683	0.0412727	0.00108438	78.3156	44.6531	43.3453	12.0017	9.05684	1142.64
13	Zhang,2019	wangjiegang	48.583	1.445	5.911	0.597	6.972	0.151	14.128	20.331	1.085	0.026	99.229	B4	c	1.79957	0.0402669	0.200432	0.0576151	0.0174836	0.124894	0.088814	0.00473747	0.780145	0.806894	0.0779216	0.00122861	78.4971	44.8089	43.3234	11.8677	13.4108	1184.72
12	Zhang,2019	wangjiegang	48.014	1.659	6.229	0.632	6.973	0.179	13.972	21.045	0.647	0.001	99.351	B4	c	1.7837	0.0463658	0.216298	0.0564284	0.0185629	0.0961912	0.118701	0.0056324	0.773791	0.837678	0.0466018	4.73926e-05	78.2648	45.866	42.3679	11.7661	9.80582	1146.03
11	Zhang,2019	wangjiegang	48.219	1.675	6.154	0.752	7.241	0.162	13.877	20.728	0.804	0	99.612	B4	c	1.78715	0.046704	0.212852	0.0559636	0.0220361	0.100258	0.122296	0.00508561	0.766741	0.82314	0.0577754	0	77.5037	45.4162	42.3045	12.2793	11.343	1162.82
10	Zhang,2019	wangjiegang	48.724	1.368	5.592	0.711	7.022	0.158	14.182	20.747	0.583	0.018	99.105	B4	c	1.81464	0.0383293	0.185359	0.0600946	0.0209359	0.0715028	0.145901	0.00498415	0.787401	0.827899	0.0420979	0.000855218	78.3636	45.1736	42.9639	11.8625	9.10562	1140.89
9	Zhang,2019	wangjiegang	48.421	1.848	6.482	0.55	7.222	0.135	13.585	20.728	0.675	0.032	99.678	B4	c	1.79632	0.0515762	0.203678	0.0797319	0.016132	0.0555086	0.167517	0.004242	0.751313	0.823914	0.048551	0.00151446	77.1101	45.8175	41.7802	12.4023	10.1813	1149.86
8	Zhang,2019	wangjiegang	49.938	1.19	4.11	0.48	7.108	0.123	14.802	20.488	0.614	0.02	98.873	B4	c	1.86147	0.0333709	0.138533	0.0420263	0.0141462	0.0617699	0.158669	0.00388343	0.822537	0.818272	0.0443748	0.000951066	78.8644	43.9636	44.1928	11.8436	9.30168	1144.23
7	Zhang,2019	wangjiegang	50.38	1.253	3.882	0.272	7.519	0.19	14.984	20.17	0.524	0.019	99.193	B4	c	1.8741	0.0350658	0.125895	0.0442993	0.00799979	0.0428433	0.190237	0.00598653	0.830949	0.803925	0.037793	0.000901666	78.0946	43.0377	44.4844	12.4778	8.26604	1137.2
6	Zhang,2019	wangjiegang	50.371	1.162	4.003	0.256	7.372	0.177	14.886	20.371	0.904	0.009	99.511	B4	c	1.86191	0.0323134	0.138086	0.0363034	0.00748157	0.0959427	0.130115	0.00554164	0.820291	0.806799	0.0647876	0.000424403	78.3955	43.5367	44.2647	12.1986	10.3379	1155.46
5	Zhang,2019	wangjiegang	49.512	1.372	4.448	0.391	7.412	0.188	14.76	20.305	1.428	0.014	99.83	B4	c	1.81859	0.0379118	0.181414	0.0111355	0.0113547	0.186059	0.0380388	0.00584881	0.808203	0.799099	0.101694	0.000656006	78.2914	43.6332	44.1303	12.2364	8.91554	1142.67
4	Zhang,2019	wangjiegang	49.871	1.33	4.534	0.303	7.105	0.146	14.659	20.433	0.632	0.016	99.029	B4	c	1.85591	0.0372354	0.144094	0.0547644	0.00891506	0.053049	0.167096	0.004602	0.813248	0.814731	0.0456005	0.000759599	78.6969	44.0842	44.004	11.9118	9.54028	1146.53
3	Zhang,2019	wangjiegang	50.084	1.255	4.159	0.195	7.38	0.207	15.007	20.458	0.568	0	99.313	B4	c	1.85858	0.0350367	0.141419	0.0404778	0.00572125	0.066921	0.160833	0.00650637	0.830208	0.813429	0.0408672	0	78.4724	43.4665	44.3632	12.1703	8.76179	1140.93
2	Zhang,2019	wangjiegang	49.368	1.308	5.051	0.548	7.377	0.17	14.313	20.62	0.838	0.001	99.594	B4	c	1.8274	0.0364269	0.172601	0.0477676	0.0160388	0.0970833	0.129423	0.00533031	0.789875	0.817862	0.0601458	4.72252e-05	77.7144	44.5885	43.0627	12.3488	11.4815	1164.83
1	Zhang,2019	wangjiegang	49.525	1.348	4.919	0.617	6.902	0.117	14.499	20.588	0.729	0	99.244	B4	c	1.83851	0.0376469	0.161487	0.0537283	0.0181093	0.0676552	0.145412	0.00367887	0.8024	0.818899	0.0524703	0	79.0178	44.6421	43.7426	11.6153	10.5363	1155.06
Reference
Yuan, X., 2019. The record of cenozoic magmatism in Sanshui Basin and its relationship with the early tectonic evolution stage of the South China Sea, China University of Geosciences (Beijing), 93 pp
Zhang, W., Fang, N., Yuan, X. and Cui, L., 2019. Geochemical and Mineralogical Investigation on Different Types of Cenozoic Basalts in the Sanshui Basin: Implications for Magma Mixing Processes. Journal of Earth Science, 30(4): 754-762.

## Sheet: whole-rock geochemistry
Whole-rock major(anhydrous) and trace element compositions for the bimodal volcanic rocks, Sanshui Basin
Sample	SiO2	TiO2	Al2O3	FeO	MnO	MgO	CaO	Na2O	K2O	P2O5	Y	La	Ce	Pr	Nd	Sm	Eu	Gd	Tb	Dy	Ho	Er	Tm	Yb	Lu	Li	Be	Sc	V	Cr	Co	Ni	Cu	Zn	Ga	Rb	Sr	Nb	Mo	Cd	In	Cs	Ba	Ta	W	Tl	Pb	Bi	Th
14SS003-2	65.4794	0.435584	15.4582	5.6707	0.111429	0.364675	1.16493	5.70311	5.55117	0.0607792	75.8	86.2	162	19.1	66.5	13.5	0.81	12.6	2.21	13.2	2.66	7.86	1.24	7.83	1.21	6.87	3.17	3.18	1.1		17.7	0.39	3.26	152	36	147	25	213				1.04	64	11.3			12.6		21.4
14SS003-5	67.0829	0.379928	14.8172	5.20295	0.0718782	0.626367	0.85227	5.61677	5.29845	0.0513416	121	143	272	31.9	115	22.7	0.62	21.1	3.66	21.4	4.23	12.2	1.89	12.2	1.89	10.2	1.76	2.39	1.45		11.8	0.66	7.85	218	46.2	255	17	391				7.67	21.6	21.2			41.3		38.4
14SS003-7	67.3887	0.335621	14.5131	5.51945	0.152555	0.183066	0.905161	5.71375	5.26824	0.0203407	140	147	287	32.1	114	22.9	0.59	22	3.92	23.5	4.84	14.1	2.24	14.2	2.16	13.8	1.78	2.37	1.06		6.95	0.41	6.21	239	45.7	239	5.94	396				0.92	15.4	21.9			24.9		40.8
14SS004-2	48.3224	2.82397	17.6143	11.0348	0.152372	5.14003	9.82294	2.8646	1.72689	0.49775	24.2	24	49.7	6.48	27.4	6.19	2.16	5.96	0.92	5.01	0.91	2.4	0.34	1.98	0.29	1.25	24.3	240	67.3		42	40.7	45.6	100	22.6	32.4	768	53.1				0.32	318	3.13			2.57		2.55
14SS011	48.253	2.6813	17.6759	9.85686	0.175316	5.6101	9.12672	4.32101	1.43346	0.866265	31.9	53.3	97.9	11.6	45.2	8.8	2.83	7.84	1.18	6.16	1.15	3.11	0.45	2.7	0.41	2.22	20	200	53.6		34.6	56	29.8	90.4	20.9	98.2	963	136				1.31	737	7.29			3.46		7.16
14SS012c	47.0546	2.91228	17.1173	10.4017	0.152742	7.07703	8.69609	3.62507	2.23003	0.73316	27.1	37.6	70.7	8.6	34.7	7.06	2.39	6.69	1	5.31	1	2.61	0.37	2.07	0.32	1.56	21	211	116		45.6	93.7	36.8	83.4	19.3	46.1	895	90.2				0.55	572	5.07			2.51		3.78
14SSZD-N	51.569	2.05341	16.0207	10.4022	0.152481	5.91626	8.05099	3.60871	1.72812	0.498104	29.4	28.1	53.4	6.61	27.4	6.23	2.09	6.23	1	5.59	1.06	2.81	0.41	2.42	0.36	1.61	21.2	159	139		42.8	108	51.1	107	22.4	24.3	447	71.8				0.48	402	4.03			2.41		3.82
14SSZD-S2	51.9188	1.92743	15.8049	9.979	0.152165	6.35037	7.65899	3.69254	2.0593	0.456496	28.2	28.7	54	6.57	26.7	6.01	1.98	5.91	0.95	5.41	1.02	2.73	0.4	2.45	0.37	1.67	20.1	148	184		38.9	126	42.8	102	21.6	39.8	414	74.2				0.36	358	4.15			2.6		4.27
16SS009-1	65.1964	0.424058	15.5474	5.33344	0.138595	0.576099	1.16254	5.85821	5.69996	0.0632985	58.8057	77.677	146.865	14.6885	65.687	12.7727	0.730562	12.0378	2.26115	13.2344	2.47189	6.87446	1.11885	6.64157	1.09364	16.2229	5.46849	3.46035	0.605932	3.4017	1.02465	0.3726	7.4628	153.871	35.7197	150.53	18.4591	126.219	1.28235	0.404	0.157811	1.67355	67.0461	8.34432	1.504	0.270808	9.59502	0.036	19.1872
17SS051-1	66.4959	0.342836	15.4582	5.19764	0.0612207	0.185703	0.588739	6.12207	5.50987	0.0377528	172	197	184	45.6	174	35.9	1.73	30.4	5.5	28.5	5.24	14.5	2.47	15.5	2.27	19.2	9.16	2.57	2.51	0.589	0.345	0.469	6	226	40.4	170	5.8	218	1.03	0.334	0.205	1.05	31	10.2	1.34	0.223	11.6	0.015	20
17SS054-1	67.1331	0.321235	14.685	5.14894	0.134613	0.355908	0.887221	6.03718	5.26214	0.034673	169	161	296	30.4	112	22	0.523	20.8	4.21	24.6	5	14.4	2.59	16.4	2.31	43.1	12.3	2.08	2.6	0.675	0.736	1.87	12	248	42.6	245	11.4	315	0.775	0.262	0.222	1.89	17	14.8	1.15	0.301	15	0.009	33.9
17SS059-1	65.8907	0.326141	15.4407	5.28349	0.223203	0.268047	1.31476	5.95208	5.25903	0.0417868	83.3	90.7	179	21	79.2	16.1	0.834	13.2	2.71	14.1	3.17	6.83	1.43	10.1	1.42	22.3	7.56	2.47	11.9	4.17	64.6	6.62	10.7	179	40.5	146	9.7	177	1.38	0.512	0.203	1.09	17.6	9.41	188	0.193	9.51	0.019	17.7
17SS065-1	48.0505	2.7962	18.0912	9.84873	0.175551	5.78162	9.5134	3.49	1.22991	1.02282	33.9	46.3	93.1	11.2	42.5	9.07	2.73	6.49	1.17	6.26	1.24	2.69	0.463	3.01	0.395	6.99	2.24	20.5	219	60.8	58.7	51.3	47.8	161	20.9	91	998	87.7	3.28	0.21	0.071	1.33	756	4.93	147	0.045	2.84	0.01	6.67
17SS066-3	47.6998	2.81256	16.9684	9.80881	0.145798	7.0314	8.61347	4.1568	1.89227	0.870653	29.7	36.9	72.5	8.33	35	7.49	2.63	5.76	1.11	5.32	1.1	2.45	0.428	2.68	0.36	49.7	1.42	21.3	225	124	69.1	85.9	52.6	158	20.1	33.6	771	65.1	2.9	0.206	0.078	0.765	609	3.88	172	0.062	1.88	0.006	3.99
18SS014-1	60.293	1.00643	17.5945	6.04475	0.130825	0.807615	3.79084	5.05789	4.98578	0.288434	40	37.3	64.7	8.31	33.2	7.02	2.34	6.26	1.28	7.22	1.45	4.01	0.71	4.35	0.585	24	2.46	8.88	33.3	3.87	8.86	3.33	18.8	107	26.9	77.9	197	55.3	5.32	0.095	0.084	3.21	771	2.88	1.29	0.642	4.66	0.086	5.97
18SS081-8	48.4758	2.87822	17.7026	10.798	0.162996	5.18904	10.017	2.74411	1.48553	0.546758	24.5	23	47.6	6.44	27.5	6.22	2.25	4.73	0.888	4.44	0.977	2.16	0.371	2.29	0.312	32.6	1.18	25.4	255	69.8	60.3	41.8	66.1	172	22.9	25.7	610	38.8	1.98	0.208	0.078	0.367	919	2.24	128	0.069	1.54	0.004	2.29
18SS082-1	51.8895	2.04516	16.4332	10.1929	0.14388	5.37496	8.33479	3.37091	1.67518	0.539552	30	27.8	51.6	6.64	27.2	6.44	2.25	5	0.985	5.17	1.07	2.4	0.458	2.93	0.38	10.5	1.35	22.1	177	165	62.3	101	64.8	156	22.3	20.9	451	48.8	2.78	0.249	0.072	0.287	391	2.84	138	0.085	2.69	0.016	3.31
19SS023-1	49.9365	2.86701	16.0469	12.4762	0.263597	4.17975	7.83441	3.56014	1.62779	1.20772	50.4	32.5	70.2	9.43	42.5	9.85	3.59	9.42	1.78	9.21	1.77	4.65	0.763	4.43	0.638	26.1	1.77	30.2	169	56	66.9	31.1	35.7	143	22.7	23	447	41.1	2.16	0.274	0.118	11.5	411	2.99	177	0.362	6.7	0.026	4.17
19SS027-1	65.8067	0.291235	16.8441	3.78296	0.0888164	0.22927	1.11537	6.06223	5.73175	0.0475064	69.3	129	221	23.6	82.2	14.6	0.604	13	2.45	12.8	2.36	6.73	1.14	7.22	1.04	16.4	7.57	3.79	2.23	2.71	93.5	0.566	8.29	118	35.1	178	34.6	143	8.52	0.385	0.153	5.77	118	9.18	355	0.714	14.8	0.067	22.2
19SS059-1	66.141	0.343871	15.2832	4.88855	0.19104	0.324251	1.70387	5.75342	5.32846	0.0423385	118	114	207	21.9	83.6	16.9	0.736	15.9	3.14	18	3.57	10.2	1.85	11.9	1.7	16.6	7.46	2.49	2.13	0.566	0.452	0.655	7.73	192	39	170	10.5	217	2	0.27	0.205	2.82	17.5	10	1.9	0.139	11.6	0.011	17
20ss017-3	63.3916	0.513823	15.3744	6.83687	0.211574	0.211574	1.78327	6.10542	5.49085	0.0805997	48.9	54.2	113	12.55	51.3	11.15	2.16	10.2	1.68	9.54	1.8	5.05	0.74	4.82	0.74	15.8	3.45	5.3	<1	2	0.5	0.5	2.3	152	34.3	84.6	17.8	83.9	4.01	0.23	0.186	0.38	227	4.6	0.6	0.14	4.5	0.02	8.66
20ss025-1	48.5787	2.63992	17.2946	10.0556	0.155901	5.87227	8.00291	4.33404	2.38009	0.685964	28.9	35	68.3	7.95	32.9	7.14	2.43	6.66	1.03	5.75	1.08	2.85	0.41	2.41	0.36	6.7	1.61	18.9	217	90	37.6	85.7	35.9	92	19.6	54.3	676	59.8	1.69	0.12	0.077	0.83	523	3.2	0.3	0.07	3.9	0.01	4.74
20ss032-2	65.4749	0.26393	16.7291	4.10208	0.0913604	0.213174	1.13693	6.32417	5.63389	0.0304535	70.7	121.5	232	23.5	81.8	14.9	0.63	13.55	2.19	13.6	2.68	7.58	1.25	7.81	1.3	17.9	7.26	2.6	1	6	1.1	1.5	7.3	111	34.6	179.5	32.3	133	9.41	0.13	0.153	5.33	99.5	7.2	1.3	0.4	7.7	0.03	28
Reference
Yuan, X., 2019. The record of cenozoic magmatism in Sanshui Basin and its relationship with the early tectonic evolution stage of the South China Sea, China University of Geosciences (Beijing), 93 pp
Zhang, W., Fang, N., Yuan, X. and Cui, L., 2019. Geochemical and Mineralogical Investigation on Different Types of Cenozoic Basalts in the Sanshui Basin: Implications for Magma Mixing Processes. Journal of Earth Science, 30(4): 754-762.
Zhang, Y. and Fang, N., 2021. Source characteristics of basalts in Sanshui Basin and the early tectonic evolution stage of the South China Sea. Marine Geology and Quaternary Geology, 41: 95-113(in Chinese with English abstract).
[truncated: 3 more columns]
