# Supplementary material for: Geochemical Insights From Clinopyroxene Phenocrysts Into the Magma Evolution of an Alkaline Magmatic System From the Sanshui Basin, South China
Source: Preprints.org preprint supplement (doi:10.20944/preprints202111.0046.v1), 2021-11-02
Supplement: Supplementary file 2 [file TableS2.xlsx]

## Sheet: Sheet1
Point	Type	Na	Mg	Al	Si	P	S	K	Ca	Sc	Ti	V	Cr	Mn	Fe	Co	Ni	Ga	Rb	Sr	Y	Zr	Nb	In	Cs	Ba	La	Ce	Pr	Nd	Sm	Eu	Gd	Tb	Dy	Ho	Er	Tm	Yb	Lu	Hf	Ta	Tl	Pb	Th	U
66-1-2-1c	B1	3958.85	76990.8	31825.1	249893	124.745	512.672	16.2113		121.738	11382.7	369.247	1186.85	1225.23	55658.7	36.1374	85.3533	11.3175	-	74.1554	27.8756	88.1927	0.984339	0.135083	-	-	5.2686	19.2775	3.50386	21.1388	6.01962	2.1422	7.49166	1.12541	6.46329	1.1728	2.96597	0.379005	2.08075	0.30155	3.69216	0.085877	-	-	0.0353855	-
66-1-3-2c	B1	5670.34	94685.3	52104.4	291632	52.2737	-	-		91.8939	10733.5	505.205	2036.81	1267.1	62069.1	53.3397	214.585	13.0394	-	71.7483	24.3906	37.781	0.35513	-	-	-	1.83059	7.95288	1.72517	10.5851	4.35305	1.51085	5.43617	0.874625	5.60283	1.10713	3.08102	0.279031	1.83658	0.283065	2.12016	-	-	-	0.0401933	-
66-1-3-3r	B1	4879.14	70231.7	36979.7	235284	194.708	437.15	1006.04		88.7273	11497.1	367.757	2085.37	1190.33	55252.3	35.8449	116.34	12.9157	2.43513	87.4953	28.2538	91.2299	3.15435	0.161767	-	25.3698	7.52664	23.1502	4.00289	19.0008	6.79312	2.29001	6.44893	0.952239	6.50961	1.0665	2.88671	0.284721	2.13728	0.293294	3.04674	0.196243	0.00869225	0.0806476	0.221425	0.0571777
66-3-2-1c	B1	5530.26	83509.4	42443.8	239736	93.525		-		69.538	14731.2	332.576	162.266	1320.19	70353	35.6315	62.2841	11.9148	-	107.779	26.2473	72.2466	0.82981	0.138833	-	-	3.73507	15.6258	3.04686	20.4193	7.0081	2.19454	6.87878	1.0198	6.31362	1.14112	3.12979	0.310299	2.08686	0.320619	2.8674	0.190427	-	-	0.0526531	-
82-2-4-1c	B1	5466.43	83277.6	42607	245378	269.382		-		109.672	15906	521.142	69.4711	1515.83	80207.9	40.0221	45.5825	17.1982	-	64.7656	40.4998	106.295	0.743001	0.108106	-	-	5.60186	21.3096	4.08456	24.5394	8.41247	2.81375	10.8496	1.59163	9.1322	1.66387	4.90122	0.551067	2.98709	0.359831	4.2042	0.148323	-	-	0.0503315	-
25-1-4-1c	B1	4812.07	59882.8	28100.2	239973	335.388	477.076	18.8567		124.237	19249.7	438.708	3.54242	1670.46	77351.6	37.0385	44.7839	20.5886	-	105.478	62.1413	469.003	6.75604	0.313776	-	-	24.832	74.2068	11.749	59.8692	15.2441	4.07953	17.5457	2.27501	13.7629	2.4263	7.13967	0.849116	5.60155	0.848139	15.8475	1.26108	-	0.0889697	0.353429	0.0377389
23-1-1c	B1	2992.77	77266.1	19239.1	215890	88.4626		-		126.812	8947.63	353.415	8.87885	1457.43	69646.8	37.6631	20.5766	9.20508	-	38.1038	20.3518	38.4662	-	0.112413	-	-	2.11556	8.48844	1.69702	11.0213	3.7794	1.51621	4.94598	0.744487	4.61904	0.871695	2.57626	0.272122	1.42293	0.207797	1.80772	0.0264045	0.00561709	-	-	-
23-1-2c	B1	3120.34	77702.9	19538.2	217853	83.953		-		124.245	9014.8	351.616	15.5659	1464.19	69062.9	37.1318	22.2338	8.91048	-	37.193	20.2516	38.0722	0.174903	0.10907	-	-	2.02451	8.53109	1.55839	10.0891	3.62108	1.46429	4.8775	0.783877	4.58408	0.849471	2.40218	0.252618	1.65738	0.262408	1.68824	0.0328855	-	0.0504435	0.0243995	-
66-3-1-2r	B3-rim	4992.4	71355.3	16559.9	247057	1120.56		298.324		128.548	8807.18	257.566	48.7295	4367.75	98739.2	31.4793	44.9621	11.6797	0.591901	68.9681	50.736	364.381	2.16231	0.53265	-	7.40202	22.5874	65.584	9.82743	47.7119	11.629	2.54139	11.0968	1.75323	11.1904	1.85479	6.36646	0.887378	6.44452	1.27373	14.7675	0.307709	-	0.230522	1.1159	0.31872
66-1-1-3r	B3-rim	3997.03	71473.1	36895.1	242949	101.5	358.954	83.2858		132.692	15970.7	446.787	1312.51	1133.08	56493.7	35.8811	81.2406	15.4957	0.361746	83.78	32.0355	126.928	1.36877	0.185747	-	-	7.31528	26.158	4.77672	26.6073	7.76946	2.25818	8.3584	1.2686	7.39724	1.34509	2.94737	0.422029	2.50019	0.311606	5.24531	0.218292	-	0.0471857	0.0948252	0.0087813
82-2-2-1c	B2-core	4246.72	82292.6	28907.1	240506	145.731		-		109.048	11666.2	414.603	27.0681	1800.28	76621.1	36.9458	34.7191	15.377	-	71.1224	45.1135	196.459	1.12878	0.154017	-	-	9.66369	32.762	5.76149	31.7599	10.2017	3.40811	11.4093	1.71434	10.3054	1.77753	5.35762	0.568167	3.50832	0.489223	7.96432	0.199633	-	-	0.150152	0.0439598
82-2-2-2r	B2-rim	4185.19	79973.6	13937.7	259626	71.4513		160.736		114.629	5164.54	197.144	21.4246	3495.24	105043	34.7799	29.1853	11.6354	0.667958	49.0975	62.7708	216.947	7.24274	0.370804	0.0752199	3.22274	14.2264	48.329	7.91527	42.0651	12.7081	2.87689	13.997	2.20647	13.186	2.61019	8.19523	0.856578	6.34364	0.92388	7.85001	0.137225	-	0.163069	0.180065	0.200344
66-1-1-1c	B3-core	5733.24	81118.7	19375	287551	100.132	352.111	103.123		55.0198	6458.11	149.539	21.0244	2671.4	84138	44.4897	62.4152	10.2796	1.04175	100.629	49.6181	57.2704	6.20329	0.416459	-	5.62232	8.9101	32.0619	5.92248	31.788	8.68809	1.33591	9.58092	1.55776	9.60628	1.92155	6.12559	1.12981	9.12049	1.8325	5.06323	0.425576	-	0.159415	0.069848	0.0299116
66-1-1-2c	B3-core	6836.03	70840.6	16927.7	271363	164.809	335.715	216.396		58.0657	7084.95	165.428	18.9229	2875.33	80390.7	43.4623	69.0197	9.47482	2.18222	120.647	48.9453	61.7082	3.89008	0.368911	0.286689	25.2785	9.63054	33.8051	6.00347	29.7253	9.54701	1.81304	9.11526	1.57338	9.60324	1.9993	5.586	0.931644	7.91409	1.79127	6.04004	0.234407	-	0.129319	0.258061	0.0354472
66-3-1-1c	B3-core	5904.13	57986.7	8923.66	247989	20.6258		-		167.015	2870.84	126.602	-	6612.41	128147	23.2708	-	11.2239	-	41.8535	69.6257	310.816	1.21827	0.833449	-	-	27.1543	85.0719	13.2571	60.894	16.4686	2.78931	14.8834	2.33425	13.8092	2.77923	9.04418	1.37497	10.6971	2.12261	13.978	0.323759	-	0.348647	0.210044	0.0344621
14-1-1c	A1	3255.75	75465.3	8164.86	257153	62.0692		-		157.942	4474.53	194.81	4.66434	3960.09	109931	31.8459	19.1921	8.99555	-	22.1673	65.0678	86.6602	0.340049	0.45422	-	-	13.0368	46.9875	8.39297	46.3172	15.3362	2.86394	16.8275	2.50346	15.4601	2.68483	9.00005	1.01953	6.53528	1.0055	3.23706	-	-	0.0839026	0.0337676	0.00559494
14-3-1c	A1	3148.67	73395.7	9983.7	249859	52.8998		9.67702		150.066	6583.01	260.355	234.66	3733.51	117032	37.8002	17.534	10.6285	-	23.2669	66.4571	120.691	1.21627	0.415584	-	-	13.6578	49.2441	8.81142	44.5739	13.7936	2.59953	15.6242	2.44332	15.3104	2.91006	8.52309	0.986431	6.36881	1.08723	3.89952	0.0882163	-	0.0700089	0.0440079	0.0186911
14-4-1c	A1	3145.81	80713.8	12692.5	252149	102.023		-		158.472	6673.03	312.256	8.89009	2975.83	102115	41.5725	16.0135	9.09515	-	29.0748	49.2004	81.4956	0.357242	0.323757	-	-	7.15878	27.026	4.85223	28.8034	10.4002	3.09908	11.9745	1.79588	11.1174	2.11309	5.90308	0.70963	4.34565	0.669287	3.23983	0.0291007	-	-	0.0317813	-
51-1-3-1c	T1	3685.14	86218	24938.3	243592	133.862		-		135.756	12240.2	349.777	-	1643.82	76018.6	40.153	5.78914	11.4767	-	58.7771	27.7949	61.9684	0.347015	0.14542	-	-	3.57534	14.2485	2.97974	19.0868	6.97343	2.25599	8.3543	1.15	6.75355	1.20128	3.44656	0.344665	2.38987	0.289179	2.8274	0.0632445	-	-	0.0261414	-
51-1-3-2c	T1	3639.32	89985.9	26635.1	246710	103.599		29.5821		158.735	12261	361.725	45.6931	1441.53	76126	47.6638	50.3063	11.1638	-	49.9766	21.1925	42.9952	0.170213	0.175457	-	-	2.39978	10.2242	2.05501	12.1535	5.31951	1.45252	5.70178	0.782499	5.01404	0.864458	2.2028	0.287357	1.74769	0.290234	2.14265	-	-	-	0.0387845	0.00859239
51-1-3-3c	T1	3833.28	88035.7	22163.3	254701	180.054		325.481		120.352	10618.4	281.177	14.0028	1911.61	85507.7	37.7574	7.95476	11.9695	2.47788	54.1908	34.3108	81.3569	6.12226	0.185727	0.229291	10.6223	19.1017	17.0562	5.38606	27.3425	8.3143	2.37591	9.63912	1.33921	7.06978	1.38044	3.76517	0.360099	2.40729	0.297222	2.69792	0.218767	-	0.483467	0.257143	0.118162
54-2-1c	T2	3332.15	39465.8	4283.79	235428	1288.16		22.618		121.389	2940.68	4.48327	-	6504.95	169398	13.2219	-	10.8523	0.114054	3.53969	92.7102	153.979	0.705084	1.19922	-	-	38.157	118.097	18.7537	95.424	25.9452	1.09999	25.4651	3.71135	21.5668	3.92871	11.8017	1.47174	11.6657	2.12945	5.0666	0.0485998	-	0.194449	0.250742	0.0681262
17-3-1-1c	T2	3187.76	19251	4488.96	242617	15.4392	652.6	-		172.195	3622.1	0.60821	-	6477.14	183425	3.75544	-	9.23728	-	3.89977	45.8641	102.957	0.522394	1.20964	-	-	16.744	56.4799	9.16604	48.8759	14.6909	1.76676	13.2879	2.11919	11.3162	1.9513	5.60427	0.866841	6.10464	1.42146	3.58607	0.0508199	-	0.0843691	0.0294791	0.00807305
17-3-1-2c	T2	3194.68	19096.1	4386.89	238387	15.9077	467.458	64.0911		166.974	3479.81	0.476881	-	6474.41	180977	3.80197	-	9.11024	0.141175	3.99402	46.16	99.387	0.671458	1.07602	-	-	16.888	56.1067	9.61848	51.0344	13.9729	1.91837	12.8215	1.91619	11.1391	1.89686	5.28292	0.791848	6.40134	1.26455	3.31299	0.0434777	-	0.159214	0.0429764	0.00481247
17-3-2-1c	T2	3257.58	17420.2	4265.78	243908	84.3253	513.026	-		146.821	3554.55	0.673895	-	6676.15	186665	3.73598	-	9.36888	-	3.75026	48.1455	106.394	0.627996	1.37028	-	-	18.5736	59.3737	9.8972	50.0625	13.6286	1.92616	14.2182	1.91377	10.7298	1.96765	5.58144	0.89406	7.19336	1.45558	3.75947	0.0383389	0.005314	0.151127	0.0317452	0.00900846
17-3-2-2c	T2	3210.76	18022.6	4107.78	247867	18.6348	554.226	-		152.619	3453.04	0.578875	-	6712.93	188382	4.22788	-	9.05148	-	3.59453	46.9061	101.653	0.5793	1.24361	-	-	17.3336	58.0973	10.2001	50.0727	14.1037	1.93604	12.6149	1.86309	10.4889	2.09807	5.46227	0.931086	6.82071	1.53161	3.64224	0.0446622	-	0.194332	0.0120399	-
17-3-3-6c	T2	3103.28	16805.6	4315.14	227332	15.6998	565.084	-		145.636	3535.18	0.724655	-	6306.26	176489	3.44451	-	9.48865	-	3.5154	46.2843	106.626	0.644022	1.355	-	1.07413	17.0746	54.4962	9.42876	45.8011	13.6863	1.79634	12.2736	1.9429	10.0971	1.93708	5.31951	0.762635	6.71746	1.41147	3.58302	0.0775509	-	0.143885	0.0208104	-
09-1-1-1c	T3	21948.7	7057.11	1796.97	241782	14.1781	531.524	834.04		23.9489	2599.46	0.510018	-	7540.68	201227	4.01177	-	20.8749	17.2369	0.864473	175.5	1207.81	59.6727	2.85123	1.56978	-	131.498	354.033	51.2716	218.259	50.3574	1.17727	45.6644	7.00872	42.0755	8.11636	24.0258	3.89273	35.0515	6.90069	31.7175	3.72413	0.0547293	3.26745	14.6306	2.31886
09-1-1-2r	T3	17421.1	8862.69	1701.64	231976	15.6837	614.786	720.264		26.2685	2235.38	0.488142	-	7350.47	185939	4.7651	-	16.7009	14.4347	0.70459	149.362	713.698	64.7088	2.57922	1.46127	-	103.967	278.733	40.4113	174.695	41.5186	1.00552	36.6309	5.50179	35.268	6.45689	19.6763	3.34229	27.1041	5.58133	19.4401	3.62323	-	2.98553	11.8112	2.69161
09-1-2C	T3	5894.17	6251.98	2338.72	237361	12.6691	508.537	-		31.4343	2352.73	0.723436	-	7708.28	205396	4.14019	-	21.7494	0.167354	0.64691	166.059	499.12	1.72391	3.46758	-	-	114.241	341.414	52.3422	238.408	54.9267	1.20699	45.8089	6.96325	40.4416	7.70348	21.4053	3.51769	32.4711	6.46105	17.8409	0.110016	0.00449685	0.533657	0.0728713	0.00543059
54-1-1c	T3	10197.5	13117	1753.03	232190	23.5186		17.6252		29.3011	2650.98	79.9895	10.8337	7711.86	231595	7.01892	9.14039	24.8976	0.265022	8.6939	224.063	1030.43	3.68884	3.19334	-	-	150.968	455.747	68.4885	311.09	74.2897	1.34049	62.016	9.20248	55.5268	9.79706	34.4291	4.91839	44.0468	8.74354	32.9017	0.133809	-	1.07104	0.105748	0.0258721
54-5-1c	T3	10227	10343.4	1462.73	231560	4663.66		113.357		29.728	2080.33	47.1441	-	7613.59	234077	5.30609	1.67992	35.7584	1.12521	8.24679	275.039	862.368	7.61058	3.56866	0.0785928	1.47852	298.109	788.015	110.546	489.806	109.473	1.78057	87.9143	12.4083	68.1737	12.495	40.0417	5.34631	46.0328	9.09921	25.7159	0.235824	-	1.8502	2.76955	0.370681
54-5-2r	T3	9391.74	10853	1105.98	234211	22.3486		-		27.2862	1807	41.9458	-	7706.9	233214	6.71845	2.65772	21.148	0.105961	6.95396	194.99	636.145	1.1471	3.40918	-	-	119.735	386.414	60.5606	282.382	68.1195	1.32169	57.1508	8.11554	48.2994	8.68697	29.5026	4.4143	40.2271	8.11368	18.0851	0.0302524	-	0.91186	0.0302173	-
03-5-1c	T4	100824	330.425	1585.23	282336	18.439	465.812	36.8252	16174.9	4.1667	1805.56	0.185516	85.173	2683.48		0.885338	-	12.015	0.586582	1.07494	460.282	1133.26	21.4813	0.436341	-	-	52.2168	170.586	24.9417	112.657	39.5239	1.12652	45.5457	10.333	79.8068	17.9168	60.4587	10.8982	81.1329	11.0892	8.24825	1.44183	-	2.55932	0.843028	-
03-5-2c	T4	99722	359.224	1498.38	277546	12.9414	608.943	19.1247	15879.6	4.73163	3088.17	-	31.3471	2868.95		0.865783	-	10.3543	0.628896	0.682116	559.14	1417.13	21.1434	0.511166	-	-	41.6752	146.414	23.2135	105.202	34.4608	0.901573	45.3934	10.5539	86.1036	20.1322	75.2189	14.3761	104.527	13.4725	8.38618	5.31868	-	1.89704	0.350507	0.0267713
