# Supplementary material for: Geochemical Insights From Clinopyroxene Phenocrysts Into the Magma Evolution of an Alkaline Magmatic System From the Sanshui Basin, South China
Source: Preprints.org preprint supplement (doi:10.20944/preprints202111.0046.v1), 2021-11-02
Supplement: Supplementary file 3 [file TableS3.xlsx]

## Sheet: Sheet1
Kd	Ol1	Cpx1	Cpx3	Amph4	Pl1	Afs4	Ap5	Aeg3
La	0.00064	0.0536	0.38	0.24	0.27	0.03	14.5	0.01
Ce	0.0005	0.0858	0.66	0.18	0.2	0.03	16.6	0.03
Pr	0.0008	0.1	1.07	0.35	0.17	0.03	17	0.07
Nd	0.001	0.19	1.57	0.39	0.14	0.04	21	0.13
Sm	0.0013	0.29	2.57	0.39	0.11	0.03	20.7	0.33
Eu	0.0016	0.47	2.94	0.39	0.73	0.37	25.5	0.45
Gd	0.0015	0.48	3.22	0.33	0.066	0.03	21.7	0.6
Tb	0.0015	0.48	3.38	0.32	0.06	0.02	15.4	0.76
Dy	0.0017	0.442	3.41	0.31	0.055	0.2	16.9	0.92
Ho	0.0016	0.42	3.3	0.33	0.048	0.02	13.3	1.06
Er	0.0015	0.387	3.12	0.40	0.041	0.02	14.1	1.16
Tm	0.0015	0.41	2.88	0.55	0.036	0.02	11.2	1.24
Yb	0.0015	0.43	2.64	0.83	0.031	0.02	9.7	1.28
Lu	0.0015	0.433	2.4	1.4	0.025	0.03	7.9	1.3
Reference
1	McKenzie, D. and O'Nions, R.K. (1991). Partial melt distributions from inversion of rare Earth element concentrations. Journal of Petrology 32: 1,021-1,091.
2	Hart, S.R. and Dunn, T. (1993). Experimental cpx/melt partitioning of 24 trace elements. Contributions to Mineralogy and Petrology 113: 1-8.
3	Marks, M., Halama, R., Wenzel, T. and Markl, G., 2004. Trace element variations in clinopyroxene and amphibole from alkaline to peralkaline syenites and granites: implications for mineral–melt trace-element partitioning. Chemical Geology, 211(3): 185-215.
4	Marshall, A.S. et al., 2009. Fractionation of Peralkaline Silicic Magmas: the Greater Olkaria Volcanic Complex, Kenya Rift Valley. Journal of Petrology, 50(2): 323-359.
5	Fujimaki, H. (1986). Partition-Coefficients of Hf, Zr, and Ree between Zircon, Apatite, and Liquid. Contributions to Mineralogy and Petrology 94(1): 42-45.
